# Supplementary material
Source: publisher figshare collection journal article supplement (https://gsajournals.figshare.com/ndownloader/files/28388739)
Supplement: Supplementary file 1 [file 28388739]

## Sheet: Table 1
Table S1: Temperature-sensitive alleles of essential genes in the "Boone TS collection" that we screened
Sys Name	ts allele	Strain ID	ts on SC	Mutation if known	Reference or Source
YAL001C	tfc3-G349E	Y09799	Lethal at 37°C ~ 38.5°C	G349E	1
YAL003W	efb1-4	Y11752	Lethal at 37°C; sick at 22°C ~ 26°C	K120R, S121L	2
YAL038W	cdc19-1	Y05131	Lethal at 37°C		4
YAL041W	cdc24-1	Y08975	Lethal at 30°C ~ 35°C	P150L	4, sequenced in 398
YAL041W	cdc24-2	Y08982	Lethal at 35°C		4
YAL041W	cdc24-3	Y08987	Lethal at 35°C ~ 37°C		4
YAL041W	cdc24-11	Y07389	Lethal at 30°C		5
YAL041W	cdc24-4	Y07390	Lethal at 35°C		5
YAL041W	cdc24-5	Y08265	Lethal at 30°C ~ 35°C		6
YAL041W	cdc24-H	Y05299	Lethal at 37°C		7
YAR007C	rfa1-M2	Y08182	Sick at 38.5°C	Y96-GS-V97 (GS inserted between 96 and 97)	8
YAR019C	cdc15-2	Y04869	Lethal at 37°C		4
YBL023C	mcm2-1	Y06468	Lethal at 37°C	E392K	9 sequenced in 402
YBL034C	stu1-5	Y08183	Lethal at 35°C	Mutation in the N-region: S88T Q257K T492A F483L Y534H L561S V575A T579S N596I P616L S621T	10, sequenced in this study
YBL034C	stu1-8	Y09448	Lethal at 35°C ~ 37°C	Mutation in the mid-region	Tim Huffaker
YBL034C	stu1-6	Y10325	Lethal at 30°C ~ 35°C	Mutation in the N-region	Tim Huffaker
YBL034C	stu1-7	Y10327	Lethal at 30°C ~ 35°C	Mutation in the N-region	Tim Huffaker
YBL035C	pol12-ts	Y08875	Lethal at 30°C ~ 35°C		Rodney Rothstein
YBL050W	sec17-1	Y05361	Lethal at 37°C		11
YBL076C	ils1-1	Y08184	Lethal at 35°C		12
YBL084C	cdc27-1	Y06441	Lethal at 30°C		4
YBL084C	cdc27-2	Y06444	Lethal at 37°C		4
YBL093C	rox3-182	Y11993	Lethal at 37°C	Q182Stop	13
YBL105C	pkc1-4	Y09967	Lethal at 35°C	S893F	15
YBL105C	pkc1-1	Y09957	Lethal at 35°C ~ 37°C	N834I	16
YBL105C	pkc1-2	Y09962	Lethal at 35°C ~ 37°C	P1023L	16
YBL105C	pkc1-3	Y09972	Lethal at 37°C	L887S	16
YBL105C	pkc1-ts	Y09952	Lethal at 35°C		Jeremy Thorner
YBR055C	prp6-1	Y09452	Lethal at 35°C		17
YBR055C	prp6-ts	Y08880	Lethal at 35°C		James Friesen
YBR058C-A	tsc3-2	Y10082	Lethal at 35°C	Y39Stop	18
YBR060C	orc2-1	Y08224	Lethal at 30°C	P603L	19, sequenced in 399
YBR060C	orc2-3	Y08436	Lethal at 30°C		Jasper Rine
YBR060C	orc2-2	Y08283	Lethal at 30°C ~ 35°C		Jasper Rine
YBR060C	orc2-4	Y08281	Lethal at 37°C ~ 38.5°C		Jasper Rine
YBR079C	rpg1-1	Y11833	Lethal at 35°C	R731I	20
YBR080C	sec18-1	Y05587	Lethal at 30°C		11
YBR087W	rfc5-1	Y04960	Lethal at 37°C	G128E	21
YBR102C	exo84-102	Y04965	Lethal at 37°C		Boone Lab Collection
YBR109C	cmd1-3	Y07400	Lethal at 35°C ~ 37°C	D20A, E31V, D56A, E67V, D93A, E104V	22
YBR109C	cmd1-8	Y07402	Lethal at 37°C	G113V	23
YBR109C	cmd1-1	Y07398	Lethal at 35°C ~ 37°C	I100N, E104V	24
YBR110W	alg1-1	Y07727	Lethal at 37°C		25
YBR123C	tfc1-E447K	Y10073	Lethal at 35°C	E447K	26
YBR135W	cks1-35	Y08405	Lethal at 35°C ~ 37°C	F8L, D36G, I79V, V145A	27
YBR135W	cks1-38	Y08441	Lethal at 35°C ~ 37°C	S35T, N38Y, N60D, L77H	27
YBR143C	sup45-ts	Y10097	Lethal at 30°C		28
YBR155W	cns1-1	Y10071	Lethal at 30°C ~ 35°C		30
YBR156C	sli15-3	Y07949	Lethal at 37°C		31
YBR160W	cdc28-1	Y07488	Lethal at 35°C ~ 37°C		4
YBR160W	cdc28-4	Y07392	Lethal at 35°C		32
YBR160W	cdc28-13	Y07489	Lethal at 35°C		32
YBR160W	cdc28-td	Y05643	Lethal at 37°C	ts degron	397
YBR193C	med8-39	Y11299	Lethal at 30°C ~ 35°C		Larry Myers
YBR193C	med8-51	Y11249	Lethal at 35°C ~ 37°C		Larry Myers
YBR196C	pgi1-2	Y06446	Lethal at 37°C		4
YBR198C	taf5-3	Y09802	Lethal at 37°C	D476N, E545K, D715N	33
YBR198C	taf5-20	Y09824	Lethal at 35°C	G115A, E434K, V438I, C596Y, D597N	33
YBR198C	taf5-15	Y09819	Lethal at 35°C	G306S, E396K, S542F	33
YBR202W	cdc47-ts	Y06524	Lethal at 37°C		Jasper Rine
YBR211C	ame1-4	Y11139	Lethal at 35°C ~ 37°C	D23E, S45Y, S52P, D86V, E93G, S99R, N116D, I120T, S127P, Y171H, K172R, L216S, I221T, N253S, I289V, F259L, V296I, Q321R	34
YBR236C	abd1-8	Y08742	Lethal at 30°C ~ 35°C	N41S, F190L, V231A, D285E, F296S, I309V, K382E, D407V	35
YBR236C	abd1-5	Y06408	Lethal at 30°C	Q189L, C243G, N317S, R356G, K390I, D407V	35
YBR237W	prp5-1	Y06487	Lethal at 37°C		36
YBR247C	enp1-1	Y09975	Lethal at 30°C ~ 35°C	W242G, V415A	37
YBR265W	tsc10-1	Y09980	Lethal at 35°C		38
YCL059C	krr1-18	Y08411	Lethal at 35°C ~ 37°C	F45L, L95S, and R207G	39
YCL059C	krr1-17	Y08407	Lethal at 35°C	K20E, K66N, C162R, and D261A	39
YCR002C	cdc10-1	Y06417	Lethal at 37°C		4
YCR002C	cdc10-2	Y06420	Lethal at 37°C		4
YCR002C	cdc10-4	Y06421	Lethal at 37°C		4
YCR002C	cdc10-5	Y06424	Lethal at 37°C		4
YCR093W	cdc39-1	Y06453	Lethal at 37°C		32
YDL003W	mcd1-73	Y06319	Lethal at 37°C		41
YDL007W	rpt2-RF	Y10114	Lethal at 35°C ~ 37°C; sick at 22°C	K229R, S241F	42
YDL008W	apc11-22	Y11147	Lethal at 30°C ~ 35°C; sick at 22°C ~ 26°C	F12S, K56R, E127K, E128V	43
YDL014W	nop1-3	Y06537	Lethal at 37°C	V87D, E103G, A175V, P219S	44
YDL017W	cdc7-4	Y07239	Lethal at 35°C		4
YDL017W	cdc7-1	Y04863	Lethal at 37°C		4
YDL028C	mps1-3796	Y07430	Lethal at 30°C ~ 35°C		45
YDL028C	mps1-6	Y07436	Lethal at 30°C		45
YDL028C	mps1-1	Y07427	Lethal at 26°C ~ 30°C		46
YDL028C	mps1-417	Y07433	Lethal at 30°C ~ 35°C		Francis Luca
YDL029W	arp2-14	Y04958	Lethal at 37°C		Boone Lab Collection
YDL030W	prp9-1	Y10151	Lethal at 30°C		36
YDL030W	prp9-ts	Y08877	Lethal at 26°C		James Friesen
YDL043C	prp11-1	Y08891	Lethal at 30°C ~ 35°C		47
YDL058W	uso1-1	Y09413	Lethal at 35°C ~ 37°C		48
YDL064W	ubc9-2	Y08895	Lethal at 35°C	Y68L	49
YDL084W	sub2-1	Y11705	Lethal at 30°C	D22G, E83G, L142M, and I146T	50
YDL087C	luc7-1	Y11009	Lethal at 35°C	E149K	51
YDL090C	ram1-119	Y08416	Lethal at 37°C ~ 38.5°C		Jasper Rine
YDL097C	rpn6-1	Y12326	Lethal at 37°C	Stop435Y	52
YDL102W	cdc2-1	Y08960	Lethal at 30°C ~ 35°C		4
YDL102W	cdc2-7	Y04851	Lethal at 37°C		4
YDL102W	cdc2-2	Y07243	Lethal at 30°C ~ 35°C		4
YDL105W	nse4-ts1	Y11840	Lethal at 35°C	D103N, R127K, S195F	54
YDL105W	nse4-ts3	Y11842	Lethal at 35°C	G224D	54
YDL105W	nse4-ts4	Y11844	Lethal at 35°C	G224S, S231D	54
YDL105W	nse4-ts2	Y11940	Lethal at 35°C ~ 37°C	S329D	54
YDL108W	kin28-ts	Y06462	Lethal at 37°C		55
YDL126C	cdc48-3	Y07827	Lethal at 30°C ~ 35°C		56
YDL126C	cdc48-2	Y07829	Lethal at 30°C		57
YDL126C	cdc48-9	Y07731	Lethal at 35°C		Martin Latterich
YDL132W	cdc53-1	Y11694	Lethal at 35°C ~ 37°C		58
YDL143W	cct4-1	Y11211	Lethal at 37°C; sick at 22°C ~ 35°C		60
YDL145C	cop1-1	Y10934	Lethal at 37°C		61
YDL147W	rpn5-1	Y12332	Lethal at 35°C	I180L, R334G, W415Stop	62
YDL164C	cdc9-1	Y05129	Lethal at 37°C		4
YDL165W	cdc36-16	Y08308	Lethal at 30°C ~ 35°C		32
YDL217C	tim22-19	Y11032	Sick at 38.5°C		66
YDL220C	cdc13-1	Y04867	Lethal at 37°C		4
YDR002W	yrb1-51	Y10117	Lethal at 30°C ~ 35°C	A91D	67
YDR013W	psf1-1	Y10119	Lethal at 30°C ~ 35°C	R84G	68
YDR021W	fal1-1	Y11208	Lethal at 37°C ~ 38.5°C	I85T, Q144R, V244A, V246A	69
YDR050C	tpi1-1670	Y11754	Lethal at 35°C		Peter Orlean
YDR052C	dbf4-2	Y07417	Lethal at 30°C		70
YDR052C	dbf4-1	Y07414	Lethal at 30°C ~ 35°C		70
YDR052C	dbf4-ts	Y06458	Lethal at 37°C		70
YDR052C	dbf4-4	Y07423	Lethal at 30°C		71
YDR052C	dbf4-3	Y07420	Lethal at 35°C ~ 37°C		71
YDR054C	cdc34-1	Y06447	Lethal at 37°C	P71S	72
YDR054C	cdc34-2	Y08276	Lethal at 35°C ~ 37°C	G58R	73
YDR060W	mak21-1	Y11564	Lethal at 35°C		74
YDR060W	mak21-3	Y07988	Sick at 38.5°C		74
YDR062W	lcb2-19	Y10125	Lethal at 26°C ~ 30°C	C553Y	38
YDR062W	lcb2-16	Y10123	Lethal at 26°C ~ 30°C	G343C	38
YDR062W	lcb2-1	Y10124	Lethal at 30°C	R437S	38
YDR062W	lcb2-2	Y10099	Lethal at 30°C	R442M	38
YDR082W	stn1-13	Y10155	Lethal at 30°C	T101S, D134V, T203A, I209V, S393R, M416T	75
YDR087C	rrp1-1	Y07732	Lethal at 35°C		76
YDR088C	slu7-ts2	Y10667	Lethal at 35°C	C135A, E217A	77
YDR088C	slu7-ts1	Y10662	Lethal at 35°C	E215A, I216A, E217A	77
YDR145W	taf12-ts23	Y09840	Lethal at 35°C		40
YDR145W	taf12-L464A	Y09838	Lethal at 30°C	L464A	79
YDR145W	taf12-W486stop	Y09834	Lethal at 30°C ~ 35°C	W486stop	79
YDR145W	taf12-9	Y09829	Lethal at 35°C	W486stop	80
YDR164C	sec1-1	Y05137	Lethal at 37°C	G443E	11
YDR166C	sec5-24	Y05572	Lethal at 37°C		11
YDR167W	taf10-ts34	Y11413	Lethal at 35°C ~ 37°C	G101E	81
YDR168W	cdc37-ts	Y08314	Lethal at 35°C ~ 37°C		32
YDR168W	cdc37-1	Y08317	Lethal at 35°C ~ 37°C		32
YDR170C	sec7-1	Y05356	Lethal at 37°C		11
YDR172W	sup35-td	Y05085	Lethal at 37°C	ts degron	397
YDR180W	scc2-4	Y06271	Lethal at 37°C		41
YDR182W	cdc1-6	Y08996	Lethal at 26°C ~ 30°C		4
YDR182W	cdc1-2	Y08990	Lethal at 35°C		4
YDR182W	cdc1-1	Y05121	Lethal at 37°C		4
YDR188W	cct6-18	Y11995	Lethal at 37°C ~ 38.5°C; sick at 22°C	LTKDG(59) to AAAAA (59)	82
YDR189W	sly1-ts	Y07989	Lethal at 30°C ~ 35°C		83
YDR196C	ydr196c-1	Y04966	Lethal at 37°C		Boone Lab Collection
YDR208W	mss4-102	Y06598	Lethal at 30°C		84
YDR208W	mss4-103	Y06593	Lethal at 37°C		Scott Emr
YDR212W	tcp1-2	Y09436	Lethal at 35°C ~ 37°C	G423D	85
YDR228C	pcf11-ts9	Y10706	Lethal at 30°C		86
YDR228C	pcf11-2	Y10724	Lethal at 35°C		86
YDR228C	pcf11-ts10	Y10704	Lethal at 35°C		86
YDR228C	pcf11-ts2	Y10733	Lethal at 35°C		86
YDR238C	sec26-11D26	Y11187	Lethal at 35°C ~ 37°C	E633D, I733T, D781V, T768P, F802L	87
YDR238C	sec26-F856AW860A	Y11182	Lethal at 37°C ~ 38.5°C	F856A, W860A	88
YDR243C	prp28-101	Y10096	Lethal at 37°C	F442G	89
YDR292C	srp101-47	Y11220	Lethal at 30°C ~ 35°C		90
YDR303C	rsc3-1	Y09598	Lethal at 35°C	M709I, L828S	91
YDR311W	tfb1-1	Y10926	Lethal at 38.5°C	deletion of C-terminal 111 amino acids	92
YDR311W	tfb1-6	Y11039	Lethal at 35°C ~ 37°C	deletion of the final 34 amino acids	92
YDR325W	ycg1-2	Y10100	Lethal at 30°C ~ 35°C		93
YMR117C	spc24-9	Y08196	Lethal at 35°C	V179D	250
YDR331W	gpi8-ts	Y08897	Lethal at 35°C		Akio Toh-e
YDR356W	spc110-220	Y08254	Lethal at 38.5°C	S853G, C911R	95
YDR356W	spc110-221	Y08186	Slow at 38.5°C	M15T, T30M, D62E, S67P, S94P, K99N, K110E, L119S, N163Y	404
YDR361C	bcp1-ts	Y10106	Lethal at 30°C ~ 35°C		96
YMR117C	spc24-10	Y08261	Lethal at 35°C	K16E, L38P, E66V, K123E	250
YDR364C	cdc40-ts	Y04853	Lethal at 37°C		Jasper Rine
YDR373W	frq1-1	Y08899	Lethal at 35°C ~ 37°C	F34S, K151E, G162S, N184Y	98
YDR437W	gpi19-2	Y11943	Lethal at 37°C		100
YDR437W	gpi19-2-XH	Y11929	Lethal at 37°C		397
YDR460W	tfb3-ts	Y10703	Lethal at 37°C ~ 38.5°C	C16Y	101
YDR473C	prp3-1	Y05608	Lethal at 37°C		102
YDR478W	snm1-172	Y11011	Lethal at 35°C	C64A	103
YDR498C	sec20-1	Y05592	Lethal at 37°C		11
YDR510W	smt3-331	Y08933	Lethal at 35°C		104
YEL019C	mms21-1	Y09914	Lethal at 35°C; sick at 22°C	S196stop	106
YEL032W	mcm3-1	Y06474	Lethal at 37°C	G246E	9
YEL034W	hyp2-3	Y11236	Lethal at 35°C	C39Y, G118D	108
YEL034W	hyp2-2	Y11296	Lethal at 38.5°C	P83L	108
YEL034W	hyp2-1	Y11232	Lethal at 35°C ~ 37°C	P83S	108
YEL055C	pol5-1	Y10143	Lethal at 35°C ~ 37°C	V404M, R491E, Q671P	110
YEL055C	pol5-2	Y10140	Lethal at 30°C ~ 35°C	L466S, L594S	110
YEL055C	pol5-3	Y10144	Lethal at 30°C ~ 35°C	W292R	110
YER008C	sec3-2	Y05351	Lethal at 38.5°C		11
YER012W	pre1-1	Y08187	Lethal at 38.5°C		113
YER013W	prp22-1	Y07955	Lethal at 30°C ~ 35°C		102
YER018C	spc25-1	Y09508	Lethal at 30°C ~ 35°C	L25P	114
YER022W	srb4-2	Y09845	Lethal at 35°C ~ 37°C		115
YER093C	tsc11-1	Y10668	Lethal at 30°C		38
YER093C	tsc11-7	Y10670	Lethal at 30°C		Marc Sohrmann
YER125W	rsp5-3	Y09488	Lethal at 30°C ~ 35°C	T104A, E673G, Q716P	116
YER125W	rsp5-sm1	Y09485	Lethal at 30°C ~ 35°C		117
YER125W	rsp5-1	Y07737	Lethal at 30°C ~ 35°C		Fred Winston
YER133W	glc7-12	Y07746	Lethal at 37°C		118
YER133W	glc7-10	Y07743	Sick at 38.5°C		118
YER136W	gdi1-1	Y06268	Lethal at 30°C		11
YER148W	spt15-P65S	Y09517	Lethal at 30°C ~ 35°C	P65S	120
YER157W	cog3-2	Y05551	Lethal at 38.5°C		63
YER157W	cog3-1	Y05295	Lethal at 38.5°C		63
YER168C	cca1-1	Y11436	Lethal at 35°C; sick at 22°C ~ 26°C		121
YER171W	rad3-ts14	Y10130	Lethal at 35°C ~ 37°C	C590Y	121
YFL005W	sec4-8	Y08272	Lethal at 35°C		11
YFL008W	smc1-259	Y06277	Lethal at 37°C		41
YFL008W	smc1-2	Y08335	Lethal at 35°C	S173L	122
YFL009W	cdc4-3	Y08448	Lethal at 30°C ~ 35°C		4
YFL009W	cdc4-2	Y09001	Lethal at 35°C		4
YFL009W	cdc4-1	Y04859	Lethal at 37°C		4
YFL017C	gna1-ts	Y12387	Lethal at 37°C ~ 38.5°C	D99N	123
YFL029C	cak1-23	Y10614	Lethal at 35°C	D226A	124
YFL034C-B	mob2-34	Y10219	Lethal at 30°C ~ 35°C	A206T, V231A	Francis Luca
YFL034C-B	mob2-22	Y10212	Lethal at 35°C ~ 37°C	E170K, T239I, S315G	Francis Luca
YFL034C-B	mob2-19	Y10203	Lethal at 30°C	K156E, F237S, H271R	Francis Luca
YFL034C-B	mob2-14	Y10200	Lethal at 30°C ~ 35°C	L143S, F237S, K304E	Francis Luca
YFL034C-B	mob2-40	Y10222	Lethal at 26°C ~ 30°C	L143S, T200M, F237S, N241D	Francis Luca
YFL034C-B	mob2-8	Y10244	Lethal at 35°C	Q130R, N167D, N208D, N241D	Francis Luca
YFL034C-B	mob2-20	Y10206	Lethal at 30°C	S250L, K274E, F298L, S315G	Francis Luca
YFL034C-B	mob2-28	Y10215	Lethal at 30°C ~ 35°C	S298P	Francis Luca
YFL034C-B	mob2-11	Y10199	Lethal at 26°C ~ 30°C; sick at 22°C	W163R	Francis Luca
YFL037W	tub2-443	Y07991	Lethal at 35°C	K324A	405
YFL038C	ypt1-3	Y10137	Lethal at 35°C ~ 37°C		125
YFL039C	act1-133	Y07350	Sick at 38.5°C	D24A, D25A	126
YFL039C	act1-101	Y07246	Lethal at 35°C	D363A, E364A	126
YFL039C	act1-124	Y06384	Lethal at 37°C	D56A, E57A	126
YFL039C	act1-122	Y07860	Lethal at 38.5°C	D80A, D81A	126
YFL039C	act1-136	Y07351	Lethal at 35°C	DA2	126
YFL039C	act1-4	Y07250	Lethal at 30°C	E259V	126
YFL039C	act1-105	Y07857	Lethal at 30°C ~ 35°C	E311A, R312A	126
YFL039C	act1-121	Y07869	Lethal at 38.5°C	E83A, K84A	126
YFL039C	act1-111	Y07850	Lethal at 26°C ~ 30°C	D222A, E224A, E226A	126
YFL039C	act1-120	Y06388	Lethal at 37°C	E99A, E100A	126
YFL039C	act1-112	Y07854	Lethal at 30°C ~ 35°C	K213A, E214A, K215A	126
YFL039C	act1-125	Y07349	Lethal at 35°C	K50A, D51A	126
YFL039C	act1-3	Y07249	Lethal at 37°C	P32L	126
YFL039C	act1-119	Y07851	Lethal at 37°C	R116A, E117A, K118A	126
YFL039C	act1-129	Y07868	Lethal at 37°C	R177A, D179A	126
YFL039C	act1-108	Y07348	Lethal at 30°C ~ 35°C	R256A, E259A	126
YFL039C	act1-132	Y07853	Lethal at 30°C	R37A, R39A	126
YFL039C	act1-155	Y07862	Lethal at 37°C	R177A	127
YFL039C	act1-159	Y07861	Lethal at 37°C	V159N	128
YFL045C	sec53-6	Y05556	Lethal at 30°C		129
YFR004W	rpn11-14	Y09916	Lethal at 35°C ~ 37°C	Q219stop	130
YFR004W	rpn11-8	Y09849	Lethal at 37°C	Q222stop	130
YFR005C	sad1-1	Y10912	Lethal at 30°C ~ 35°C		131
YFR027W	eco1-1	Y08150	Lethal at 35°C		132
YFR028C	cdc14-3	Y07385	Lethal at 26°C		4
YFR028C	cdc14-1	Y07353	Lethal at 30°C		4
YFR028C	cdc14-8	Y08749	Lethal at 30°C ~ 35°C		4
YFR028C	cdc14-2	Y09005	Lethal at 30°C; sick at 22°C ~ 26°C		4
YFR031C	smc2-8	Y09853	Lethal at 30°C ~ 35°C		133
YFR036W	cdc26-1	Y06439	Lethal at 37°C		4
YFR037C	rsc8-ts21	Y11873	Lethal at 30°C ~ 35°C		134
YFR037C	rsc8-ts16	Y11867	Lethal at 35°C ~ 37°C		134
YFR052W	rpn12-1	Y08935	Lethal at 30°C ~ 35°C		136
YGL001C	erg26-1	Y11254	Lethal at 30°C ~ 35°C		137
YGL022W	stt3-2	Y10017	Lethal at 30°C ~ 35°C	G210D, V393I	16
YGL044C	rna15-58	Y10619	Lethal at 35°C		139
YGL048C	rpt6-25	Y07752	Lethal at 35°C ~ 37°C	D251Y	140
YGL048C	rpt6-20	Y07751	Lethal at 37°C	G189A	140
YGL048C	rpt6-1	Y07750	Lethal at 35°C		141
YGL055W	ole1-m2	Y09606	Lethal at 30°C ~ 35°C		142
YGL061C	duo1-2	Y07958	Lethal at 37°C	A117T, M124I	143
YGL065C	alg2-1	Y09468	Lethal at 35°C		144
YGL073W	hsf1-848	Y09259	Lethal at 37°C		Mark Winey
YGL075C	mps2-1	Y09421	Lethal at 35°C	E39K	46
YGL075C	mps2-2	Y09422	Lethal at 35°C	L191S	145
YGL093W	spc105-15	Y09423	Lethal at 35°C	N2Y, S269P, S348P, D363G, I523N, L683S, L736P, D752G, M781V, and K810R (plus the change A-3G in the 5' noncoding region just before the presumed initiator ATG codon)	148
YGL097W	srm1-ts	Y11354	Lethal at 30°C		149
YGL098W	use1-ts	Y10139	Lethal at 35°C ~ 37°C	D183G, F242S	150
YGL112C	taf6-ts	Y10197	Lethal at 37°C		40
YGL116W	cdc20-3	Y08890	Lethal at 35°C ~ 37°C	E494K	4, sequenced in this study
YGL116W	cdc20-1	Y05078	Lethal at 37°C	G544R	4, sequenced in 400
YGL116W	cdc20-2	Y09007	Lethal at 37°C	G360S	4, sequenced in this study
YGL120C	prp43-ts2	Y10176	Lethal at 35°C	L439A, Y440A	151
YGL130W	ceg1-34	Y08750	Lethal at 30°C	P346L	152
YGL130W	ceg1-C354	Y06505	Lethal at 37°C	C354Y	152
YGL130W	ceg1-3	Y06456	Lethal at 30°C	F51Y, N190Y, Y226F	153
YGL130W	ceg1-ts	Y08754	Lethal at 30°C ~ 35°C		James Friesen
YGL137W	sec27-1	Y09990	Lethal at 26°C ~ 30°C		154
YGL145W	tip20-5	Y08148	Lethal at 30°C ~ 35°C		155
YGL155W	cdc43-2	Y08442	Lethal at 35°C ~ 37°C		156
YGL207W	spt16-ts	Y08679	Lethal at 35°C		Mike Tyers
YGL233W	sec15-1	Y05145	Lethal at 37°C		11
YGR002C	swc4-4	Y04981	Lethal at 37°C		Boone Lab Collection
YGR006W	prp18-ts	Y09308	Lethal at 30°C ~ 35°C		Pascal Preker
YGR006W	prp18-1202	Y09296	Lethal at 35°C		Peter Orlean
YGR009C	sec9-4	Y05603	Lethal at 37°C		11
YGR048W	ufd1-2	Y10691	Lethal at 35°C		157
YGR074W	smd1-1	Y11288	Lethal at 37°C; sick at 22°C		158
YGR075C	prp38-1	Y09560	Lethal at 35°C	G66D	159
YGR091W	prp31-1	Y09503	Lethal at 30°C ~ 35°C		160
YGR091W	prp31-ts	Y08905	Lethal at 30°C ~ 35°C		James Friesen
YGR092W	dbf2-3	Y07411	Lethal at 37°C		161
YGR092W	dbf2-1	Y07405	Lethal at 37°C		162
YGR092W	dbf2-2	Y07408	Lethal at 37°C		162
YGR098C	esp1-1	Y11708	Lethal at 30°C ~ 35°C		163
YGR099W	tel2-15	Y10201	Lethal at 35°C		Michel Charbonneau
YGR099W	tel2-7	Y10166	Lethal at 35°C		Michel Charbonneau
YGR103W	nop7-1	Y09428	Lethal at 37°C ~ 38.5°C; sick at 22°C		164
YGR113W	dam1-1	Y07974	Lethal at 35°C	C111Y	143
YGR113W	dam1-11	Y07960	Lethal at 30°C ~ 35°C	L98P, N139S, T332A	143
YGR113W	dam1-19	Y07973	Lethal at 37°C ~ 38.5°C	Q205Stop	143
YGR113W	dam1-9	Y07966	Lethal at 35°C ~ 37°C	S97F, N139S, K170E, S328 P, T332A	143
YGR113W	dam1-5	Y07962	Lethal at 30°C ~ 35°C	T58I, L98P, N139S, T332A	143
YGR120C	cog2-1	Y07755	Lethal at 35°C ~ 37°C		167
YGR140W	cbf2-1	Y07240	Lethal at 30°C		168
YGR140W	cbf2-2	Y07864	Lethal at 35°C		169
YGR140W	cbf2-42	Y06411	Lethal at 37°C		170
YGR156W	pti1-ts7	Y09520	Lethal at 35°C ~ 37°C		171
YGR158C	mtr3-ts	Y10223	Lethal at 35°C		172
YGR172C	yip1-40	Y11718	Lethal at 35°C ~ 37°C	E70G, K130A	173
YGR172C	yip1-4	Y11714	Lethal at 37°C	E70K	173
YGR179C	okp1-5	Y07912	Lethal at 35°C		174
YGR185C	tys1-1	Y08189	Lethal at 35°C		175
YGR211W	zpr1-1	Y09996	Lethal at 35°C; sick at 22°C ~ 30°C	D444N	176
YGR216C	gpi1-1	Y09997	Lethal at 37°C ~ 38.5°C		16
YGR218W	crm1-1	Y09465	Lethal at 35°C ~ 37°C		177
YGR245C	sda1-2	Y09857	Lethal at 30°C ~ 35°C		178
YGR246C	brf1-W107R	Y09556	Lethal at 30°C; sick at 22°C	W107R	179
YGR264C	mes1-1	Y05133	Lethal at 37°C		180
YGR274C	taf1-2	Y09864	Lethal at 30°C		181
YGR274C	taf1-1	Y09859	Lethal at 30°C ~ 35°C		181
YHR007C	erg11-td	Y04662	Lethal at 37°C	ts degron	397
YHR024C	mas2-10	Y09869	Lethal at 26°C		183
YHR027C	rpn1-821	Y07992	Lethal at 30°C ~ 35°C	G821D	184
YHR036W	brl1-C371R	Y12354	Lethal at 37°C	C371R	185
YHR036W	brl1-C371S	Y12360	Lethal at 37°C	C371S	185
YHR036W	brl1-K405I	Y12366	Lethal at 37°C	K405I	185
YHR036W	brl1-2221	Y12346	Lethal at 37°C	S327T, N403Y, P444L, T445S	185
YHR036W	brl1-3231	Y12352	Lethal at 37°C	W329R, I378N, S446P	185
YHR052W	cic1-2	Y11019	Lethal at 37°C ~ 38.5°C		186
YHR058C	med6-ts	Y11997	Lethal at 37°C	Q49L, I68L, L94P, F125Y, R132G, F194L	187
YHR069C	rrp4-1	Y11192	Lethal at 30°C ~ 35°C; sick at 22°C		188
YHR088W	rpf1-1	Y11878	Lethal at 30°C ~ 35°C; sick at 22°C ~ 26°C	N55S, S87G, R126G, P169S, S192C, N201D	190
YHR107C	cdc12-1	Y05110	Lethal at 37°C		4
YHR107C	cdc12-td	Y05569	Lethal at 37°C	ts degron	397
YHR164C	dna2-1	Y08849	Lethal at 30°C	P504S	191
YHR166C	cdc23-1	Y06434	Lethal at 30°C	G472D	4, sequenced in 401
YHR166C	cdc23-4	Y06436	Lethal at 37°C	T94M	4, sequenced in 401
YHR170W	nmd3-4	Y10169	Lethal at 35°C	Y136N, T158A, L214W, S329G, R441C, E499G	192
YHR186C	kog1-1	Y08192	Lethal at 37°C	I1546T	193
YHR191C	ctf8-162	Y08339	Sick at 38.5°C	Q12Stop	194
YHR191C	ctf8-9	Y08340	Sick at 38.5°C	Q16Stop	194
YIL021W	rpb3-2	Y10236	Lethal at 30°C ~ 35°C		196
YIL026C	irr1-1	Y06274	Lethal at 37°C		132
YIL046W	met30-6	Y10360	Lethal at 30°C		198
YIL046W	met30-9	Y10347	Lethal at 37°C; sick at 22°C		199
YIL048W	neo1-2	Y07758	Lethal at 30°C ~ 35°C		200
YIL062C	arc15-10	Y04963	Lethal at 37°C		Boone Lab Collection
YIL068C	sec6-4	Y05143	Lethal at 37°C	L633P	11
YIL109C	sec24-20	Y09453	Lethal at 26°C ~ 30°C	W897Stop	sequenced in 403
YIL109C	sec24-2	Y07759	Lethal at 35°C		Chris Kaiser
YIL115C	nup159-1	Y10018	Lethal at 30°C ~ 35°C		201
YIL118W	rho3-1	Y10633	Lethal at 30°C ~ 35°C	G198D	202
YIL126W	sth1-2	Y09796	Lethal at 35°C; sick at 22°C ~ 30°C	P646L	203
YIL126W	sth1-3	Y09798	Lethal at 38.5°C	S806L, T881M	203
YIL143C	ssl2-ts	Y10370	Lethal at 30°C ~ 35°C	V552I, E556K	204
YIL144W	tid3-1	Y07976	Lethal at 30°C ~ 35°C	Q2L, S73N, K122R, H313R, N321S, E389V, E429D, T473S, I490V, D556G, K613I, H648R, I658T; the A at 2023 was missing, causing a frameshift that together with an A2067T change and the base changes due to the NsiI site at 2076, would change the last 18 residues from IEELRNLEFETEHNVTNA* to LKSYEIWSLKLNITLQMHKINDI*.	205
YIL147C	sln1-ts4	Y11879	Lethal at 35°C ~ 37°C		206
YIL150C	mcm10-1	Y06465	Lethal at 37°C	P269L	207
YIL150C	mcm10-43	Y09454	Lethal at 30°C ~ 35°C		208
YIR006C	pan1-4	Y08850	Lethal at 35°C ~ 37°C		209
YIR008C	pri1-M4	Y08681	Lethal at 30°C ~ 35°C	N186-GS-V187	210
YIR010W	dsn1-7	Y09313	Lethal at 35°C	K73R, K416R, N437I, and V451E	148
YIR010W	dsn1-8	Y09317	Lethal at 35°C ~ 37°C	Q515P, and T541P	148
YIR012W	sqt1-201	Y10246	Lethal at 35°C	T845C	Arlen Johnson
YIR022W	sec11-2	Y08324	Lethal at 35°C		Jasper Rine
YJL001W	pre3-2	Y08194	Sick at 38.5°C	G47D	211
YJL002C	ost1-6	Y11227	Lethal at 30°C ~ 35°C		212
YJL005W	cdc35-1	Y08855	Lethal at 35°C ~ 37°C	L901H	213
YJL019W	mps3-1	Y09323	Lethal at 35°C ~ 37°C	S472N	214
YJL019W	mps3-7	Y09439	Lethal at 30°C		Mark Winey
YJL034W	kar2-159	Y07833	Lethal at 30°C ~ 35°C	G417S	215
YJL039C	nup192-15	Y09575	Lethal at 26°C		216
YJL050W	mtr4-1	Y09299	Lethal at 30°C ~ 35°C	C942Y	217
YJL074C	smc3-42	Y06322	Lethal at 37°C		41
YJL074C	smc3-1	Y08012	Lethal at 30°C ~ 35°C		218
YJL081C	arp4-G161D	Y10247	Lethal at 30°C ~ 35°C	G161D	219
YJL090C	dpb11-1	Y08260	Lethal at 38.5°C	W583Stop	221
YJL097W	phs1-1	Y04983	Lethal at 37°C ~ 38.5°C; sick at 22°C ~ 26°C		Boone Lab Collection
YJL125C	gcd14-4	Y10250	Lethal at 35°C		Mercedes Tamame
YJL173C	rfa3-313	Y10624	Lethal at 30°C	P31S, E74G, R113G	224
YJL194W	cdc6-1	Y05123	Lethal at 37°C		4
YJL203W	prp21-ts	Y08909	Lethal at 30°C		102
YJR006W	hys2-ts	Y11391	Lethal at 37°C ~ 38.5°C		225
YJR017C	ess1-H164R	Y10807	Lethal at 37°C ~ 38.5°C	H164R	226
YJR045C	ssc1-2	Y08417	Lethal at 30°C ~ 35°C	P419S	227
YJR046W	tah11-ts	Y10962	Lethal at 30°C		218
YJR057W	cdc8-1	Y08966	Lethal at 30°C; sick at 22°C		4
YJR057W	cdc8-2	Y04866	Lethal at 37°C		4
YJR065C	arp3-D11A	Y08682	Lethal at 35°C ~ 37°C	D11A	228
YJR065C	arp3-F306G	Y08241	Lethal at 37°C ~ 38.5°C	F306G	228
YJR065C	arp3-G15C	Y08235	Lethal at 37°C ~ 38.5°C	G15C	228
YJR065C	arp3-G302Y	Y08226	Lethal at 37°C ~ 38.5°C	G302Y	228
YJR065C	arp3-H161A	Y08231	Lethal at 37°C ~ 38.5°C	H161A	228
YJR065C	arp3-31	Y04980	Lethal at 38.5°C		Boone Lab Collection
YJR068W	rfc2-1	Y08687	Lethal at 30°C	L304P	229
YJR076C	cdc11-4	Y06525	Lethal at 30°C		4
YJR076C	cdc11-5	Y06430	Lethal at 30°C		4
YJR076C	cdc11-1	Y08756	Lethal at 35°C		4
YJR076C	cdc11-2	Y06426	Lethal at 37°C		4
YJR076C	cdc11-3	Y06427	Lethal at 37°C		4
YJR112W	nnf1-17	Y09326	Lethal at 35°C	C53S, V78D, and C121G	148
YJR112W	nnf1-77	Y09333	Lethal at 30°C ~ 35°C	R11Q, L57S, M73K, Y124L, E151G	148
YJR112W	nnf1-48	Y09328	Lethal at 35°C ~ 37°C	Q22R, L118P, and K163*	Ghia Euskirchen
YKL006C-A	sft1-15	Y10248	Lethal at 30°C ~ 35°C		230
YKL018W	swd2-1	Y04977	Lethal at 37°C ~ 38.5°C; sick at 22°C ~ 26°C		Boone Lab Collection
YKL018W	swd2-ts1	Y07443	22°C slow & 37°C slow		Boone Lab Collection
YKL021C	mak11-2	Y12374	Lethal at 35°C	V60A, I76N, K236I, S322P, K400R	231
YKL022C	cdc16-1	Y04913	Lethal at 37°C		4
YKL024C	ura6-6	Y12315	Lethal at 35°C		Francois Lacroute
YKL024C	ura6-4	Y12311	Lethal at 35°C; sick at 22°C ~ 30°C		Francois Lacroute
YKL024C	ura6-5	Y12314	Lethal at 35°C; sick at 22°C ~ 30°C		Francois Lacroute
YKL028W	tfa1-21	Y10808	Lethal at 30°C ~ 35°C	S68P, H103L	232
YKL042W	spc42-11	Y09437	Lethal at 37°C	N58Y, E71G, L121P	233
YKL042W	spc42-10	Y09444	Lethal at 30°C ~ 35°C	Q110P	233
YKL045W	pri2-1	Y04855	Lethal at 30°C	E152Q	234
YKL049C	cse4-1	Y08710	Lethal at 38.5°C	Ala to Thr substitution in helix 3 of the Cse4 histone fold domain (HFD)	235
YKL052C	ask1-3	Y11891	Lethal at 35°C ~ 37°C		236
YKL052C	ask1-2	Y11906	Lethal at 37°C		236
YKL089W	mif2-3	Y06477	Lethal at 37°C	P505L	237, 238
YKL104C	gfa1-97	Y11755	Lethal at 30°C		239
YKL112W	abf1-103	Y08457	Lethal at 30°C		240
YKL112W	abf1-102	Y08328	Lethal at 30°C ~ 35°C		240
YKL125W	rrn3-S213P	Y09871	Lethal at 35°C ~ 37°C	S213P	241
YKL145W	rpt1-1	Y07762	Lethal at 35°C ~ 37°C		141
YKL154W	srp102-510	Y11216	Lethal at 30°C ~ 35°C		90
YKL172W	ebp2-1	Y09876	Lethal at 35°C	Q92P, S140P, F217S, E243G	243
YKL173W	snu114-60	Y10254	Lethal at 37°C ~ 38.5°C	K939Stop	244
YKL173W	snu114-40	Y10257	Lethal at 35°C	M842R	244
YKL189W	hym1-15	Y04976	Lethal at 38.5°C		Boone Lab Collection
YKL193C	sds22-5	Y10087	Lethal at 37°C	T25A, Q28R, L73P, F285S	245
YKL193C	sds22-6	Y10092	Lethal at 30°C ~ 35°C	two missense mutations (I54T, I193T) together with a silent mutation in codon 51	245
YKL203C	tor2-21	Y08921	Lethal at 26°C ~ 30°C	S233F	246
YKL210W	uba1-o1	Y07766	Lethal at 35°C ~ 37°C		247
YKR002W	pap1-1	Y07769	Lethal at 26°C ~ 30°C		248
YKR008W	rsc4-2	Y09579	Lethal at 30°C	L120P, Y275H	249
YKR062W	tfa2-45	Y10786	Lethal at 30°C ~ 35°C		251
YKR083C	dad2-9	Y09261	Lethal at 37°C		252
YKR086W	prp16-2	Y10152	Lethal at 35°C		253
YKR086W	prp16-ts	Y10328	Lethal at 30°C ~ 35°C		Pascal Preker
YLL003W	sfi1-3	Y09513	Lethal at 35°C	H207Q, F208C, Y247C	254
YLL003W	sfi1-7	Y09459	Lethal at 35°C ~ 37°C	N218D, D242A	254
YLL004W	orc3-70	Y08845	Lethal at 30°C	S335A	255
YLL031C	gpi13-3	Y07772	Lethal at 30°C		256
YLL031C	gpi13-5	Y07773	Lethal at 30°C ~ 35°C		256
YLL031C	gpi13-4	Y11486	Lethal at 37°C ~ 38.5°C		256
YLL036C	prp19-1	Y07981	Lethal at 30°C ~ 35°C		102
YLL050C	cof1-5	Y07943	Lethal at 37 ~ 38.5°C	D10A, E11A	257
YLL050C	cof1-8	Y07985	Lethal at 35°C	K23A, K24A, K26A	257
YLR005W	ssl1-T242I	Y11313	Lethal at 35°C ~ 37°C	T242I	258
YLR007W	nse1-16	Y12371	Lethal at 35°C		259
YLR022C	sdo1-VMA1-ts	Y12289	Lethal at 30°C ~ 35°C	inserting a VMA1 self splicing intein cassette into the SDO1 ORF	Alan Warren
YLR026C	sed5-1	Y07775	Lethal at 26°C		261
YLR045C	stu2-10	Y10000	Lethal at 35°C ~ 37°C		262
YLR045C	stu2-11	Y09987	Lethal at 30°C		Tim Huffaker
YLR045C	stu2-12	Y10005	Lethal at 30°C ~ 35°C		Tim Huffaker
YLR045C	stu2-13	Y10023	Lethal at 30°C ~ 35°C		Tim Huffaker
YLR066W	spc3-4	Y10262	Lethal at 35°C ~ 37°C		263
YLR071C	rgr1-100	Y07780	Lethal at 38.5°C		264
YLR078C	bos1-1	Y07794	Lethal at 30°C		63
YLR086W	smc4-1	Y08132	Lethal at 30°C		265
YLR088W	gaa1-ts	Y07826	Lethal at 38.5°C		266
YLR103C	cdc45-27	Y10796	Lethal at 30°C ~ 35°C		267
YLR105C	sen2-1	Y11650	Lethal at 35°C		268
YLR117C	clf1-1	Y12382	Lethal at 35°C		270
YLR127C	apc2-8	Y08076	Lethal at 35°C ~ 37°C		271
YLR163C	mas1-1	Y09576	Lethal at 30°C ~ 35°C		272
YLR166C	sec10-2	Y06265	Lethal at 37°C		11
YLR186W	emg1-1	Y12014	Lethal at 30°C ~ 35°C; sick at 22°C ~ 26°C		273
YLR195C	nmt1-181	Y10752	Lethal at 35°C ~ 37°C	G451D	274
YLR208W	sec13-1	Y05577	Lethal at 37°C		11
YLR212C	tub4-ΔDSY	Y11146	Lethal at 35°C ~ 37°C	Lack residues 444-448	275
YLR212C	tub4-Y445D	Y11143	Lethal at 35°C ~ 37°C	Y445D	276
YLR215C	cdc123-4	Y10346	Lethal at 30°C; sick at 22°C	Y6N, D55G, K58E, E106G, R166S, L231H, P245H, K273M	277
YLR229C	cdc42-1	Y05041	Lethal at 37°C		278
YLR249W	yef3-F650S	Y10121	Lethal at 30°C ~ 35°C	F650S	279
YLR268W	sec22-3	Y06494	Lethal at 37°C		11
YLR268W	sec22-1	Y08288	Lethal at 35°C		280
YLR272C	ycs4-1	Y09304	Lethal at 30°C ~ 35°C		281
YLR274W	cdc46-1	Y08916	Lethal at 35°C ~ 37°C	C183Y	282
YLR298C	yhc1-7	Y10339	Lethal at 26°C ~ 30°C; sick at 22°C		283
YLR298C	yhc1-1	Y10286	Lethal at 30°C ~ 35°C		283
YLR298C	yhc1-2	Y10290	Lethal at 30°C ~ 35°C		283
YLR305C	stt4-4	Y06502	Lethal at 37°C		284
YLR310C	cdc25-2	Y05087	Lethal at 37°C		4
YLR310C	cdc25-1	Y04872	Lethal at 37°C		4
YLR314C	cdc3-3	Y07236	Lethal at 30°C		4
YLR314C	cdc3-1	Y04956	Lethal at 37°C		4
YLR321C	sfh1-1	Y11150	Lethal at 30°C		285
YLR378C	sec61-2	Y07842	Lethal at 37°C		288
YLR383W	smc6-9	Y11279	Lethal at 37°C ~ 38.5°C		289
YLR397C	afg2-18	Y08133	Lethal at 35°C	L457S	290
YLR430W	sen1-1	Y12015	Lethal at 35°C	G1747D	291
YLR440C	sec39-2	Y11201	Lethal at 35°C	L172P, I577V	292
YLR440C	sec39-1	Y11197	Lethal at 30°C	lack codons 342 to 606	292
YLR457C	nbp1-1	Y07867	Sick at 38.5°C	R180W	293
YLR459W	gab1-1	Y07796	Lethal at 35°C		266
YLR459W	gab1-2	Y07801	Lethal at 35°C		Erfei Bi
YLR459W	gab1-3	Y07805	Lethal at 37°C ~ 38.5°C		Erfei Bi
YML015C	taf11-ts2	Y10332	Lethal at 35°C ~ 37°C		40
YML031W	ndc1-4	Y07496	Lethal at 35°C ~ 37°C		295
YML046W	prp39-1	Y09565	Lethal at 35°C		296
YML049C	rse1-1	Y11719	Lethal at 30°C		297
YML064C	tem1-3	Y07908	Lethal at 30°C	D135A	298
YML069W	pob3-7	Y10279	Lethal at 30°C ~ 35°C	W28R, T50I, N69K, D204G, N518K	299
YML098W	taf13-2	Y10302	Lethal at 35°C		40
YML105C	sec65-1	Y11000	Lethal at 35°C		302
YML114C	taf8-7	Y10800	Lethal at 35°C		40
YML130C	ero1-1	Y07810	Lethal at 35°C		303
YMR001C	cdc5-1	Y04861	Lethal at 37°C		4
YMR005W	taf4-18	Y10306	Lethal at 35°C ~ 37°C		40
YMR013C	sec59-ts	Y09193	Lethal at 35°C ~ 37°C		129
YMR028W	tap42-11	Y10805	Lethal at 37°C		304
YMR033W	arp9-1	Y09571	Lethal at 35°C	G337V G338L	305
YMR079W	sec14-3	Y05582	Lethal at 37°C		11
YMR094W	ctf13-30	Y05613	Lethal at 37°C	E146K	307
YMR168C	cep3-1	Y08198	Lethal at 35°C ~ 37°C		170
YMR197C	vti1-11	Y10293	Lethal at 30°C ~ 35°C	E145G, I151T	309
YMR197C	vti1-2	Y10292	Lethal at 37°C	S130P, I151T	310
YMR213W	cef1-13	Y10928	Lethal at 35°C ~ 37°C	W52G, W84G	311
YMR220W	erg8-1	Y08334	Lethal at 35°C ~ 37°C		312
YMR227C	taf7-ts1	Y10307	Lethal at 35°C ~ 37°C		40
YMR229C	rrp5-delta6	Y12395	Lethal at 35°C	two amino acid (A1494 and R1495) deletion in TPR unit 1	313
YMR235C	rna1-1	Y06489	Lethal at 30°C		314
YMR236W	taf9-ts2	Y11213	Lethal at 35°C	L39P, Y48H, F59S, S83P, F105S, M108T	315
YMR239C	rnt1-47	Y10681	Lethal at 35°C ~ 37°C	I338T	316
YMR239C	rnt1-ts	Y10679	Lethal at 38.5°C		Sherif Abou Elela
YMR240C	cus1-3	Y10309	Lethal at 30°C ~ 35°C	K138G, Y150N, L159S, K317E, I330T, K358N, D393E, D396G, S411P, N423S	317
YMR268C	prp24-ts	Y08914	Lethal at 30°C ~ 35°C		102
YMR277W	fcp1-1	Y09266	Lethal at 30°C ~ 35°C	R250A, P251A	318
YMR296C	lcb1-5	Y10156	Lethal at 35°C	D299Y	38
YMR296C	lcb1-4	Y10158	Lethal at 30°C	D320Y	38
YMR296C	lcb1-10	Y10175	Lethal at 30°C ~ 35°C	L303F	38
YMR296C	lcb1-2	Y10161	Lethal at 30°C ~ 35°C	M261R	38
YMR308C	pse1-34	Y10719	Lethal at 30°C ~ 35°C	I102T, D326G, Y363H, Q425R, T446S, K544E, L681R, E702G, S773P, N856Y, S911F, V1023A, I1037V	319
YMR308C	pse1-41	Y10721	Lethal at 30°C ~ 35°C		319
YNL006W	lst8-6	Y09493	Lethal at 26°C ~ 30°C		320
YNL006W	lst8-15	Y09494	Lethal at 37°C ~ 38.5°C		320
YNL061W	nop2-4	Y10274	Lethal at 30°C ~ 35°C; sick at 22°C	D70N, R85G, K86I, D96V, E108V, A143S, M174I, F244L, T280A, G306S, I349T, A378T, P497L, K545E	321
YNL061W	nop2-5	Y10272	Lethal at 30°C ~ 35°C	E65K, E188K, N276S, A355D, A378T, N466I, G550S, T584A, D587Y, K605Stop	321
YNL061W	nop2-3	Y10269	Lethal at 35°C ~ 37°C	K49R, A178T, E260G, I309K, V314A, K368N, G431D, G470D, Q547H, I549T	321
YNL061W	nop2-9	Y10280	Lethal at 30°C ~ 35°C	K83L, N123K, K151E, V169M, M174T, A388D, R392H, P449L, V482M, K510N	321
YNL061W	nop2-10	Y10284	Lethal at 30°C ~ 35°C	S254T, G300S, P315Q, G325C, T370S, V499I, A559E	321
YNL061W	nop2-6	Y10275	Lethal at 35°C ~ 37°C	T15S, E108G, M146I, E156K, S199T, Y241N, F263I, P315L, E484V, L573F	321
YNL062C	gcd10-506	Y11589	Lethal at 38.5°C		James Anderson
YNL075W	imp4-2	Y10028	Lethal at 35°C ~ 37°C	D22G, Q27H, A37V, V123M, K132R, L152M, N211H, R234G, Q235L, R242I, N285I	322
YNL102W	pol1-1	Y08856	Lethal at 35°C	G493R	4
YNL102W	pol1-2	Y08691	Lethal at 30°C		4
YNL102W	pol1-13	Y08695	Lethal at 30°C ~ 35°C		323
YNL102W	pol1-12	Y04999	Sick at 38.5°C		323
YNL102W	pol1-17	Y08694	Lethal at 35°C		323
YNL102W	pol1-ts	Y08689	Lethal at 35°C		Mike Tyers
YNL118C	dcp2-7	Y11259	Lethal at 38.5°C	N60D, I68V, D142V	324
YNL118C	dcp2-7Δ	Y11322	Lethal at 35°C		Roy Parker
YNL138W	srv2-ts	Y10689	Lethal at 38.5°C		326
YNL207W	rio2-1	Y08141	Lethal at 35°C	Y73H, I186V, Y210H, E364D, D371G, D417G	327
YNL216W	rap1-2	Y10037	Lethal at 30°C ~ 35°C	A458T	328
YNL216W	rap1-1	Y10032	Lethal at 30°C ~ 35°C	A563P	328
YNL222W	ssu72-2	Y06553	Lethal at 37°C	R129A	329
YNL258C	dsl1-DC30	Y09028	Lethal at 35°C	The C-terminal 30 amino acids were replaced by KanMX4.	397
YNL261W	orc5-70	Y09260	Lethal at 35°C ~ 37°C	G42R	255
YNL262W	pol2-12	Y04857	Lethal at 37°C	Q2195Stop	330
YNL263C	yif1-td	Y04722	Lethal at 37°C	ts degron	397
YNL267W	pik1-104	Y06481	Lethal at 37°C		Scott Emr
YNL267W	pik1-139	Y06484	Lethal at 37°C		Scott Emr
YNL272C	sec2-41	Y05598	Lethal at 37°C		11
YNL287W	sec21-1	Y05366	Lethal at 30°C	G482D	11
YNR003C	rpc34-1	Y10314	Lethal at 35°C		Mercedes Tamame
YNR011C	prp2-1	Y08678	Lethal at 30°C ~ 35°C		102
YNR026C	sec12-4	Y05618	Lethal at 37°C		11
YNR026C	sec12-1	Y08269	Lethal at 35°C		331
YNR035C	arc35-6	Y09500	Lethal at 35°C ~ 37°C	L15P, D185G, Y241H, F283S, K291E, H295R	332
YNR035C	arc35-5	Y09495	Lethal at 37°C	L28S, I44T, S74P, I140M, E198G, S250G, I254T	332
YNR053C	nog2-1	Y09558	Lethal at 37°C; sick at 22°C ~ 30°C		111
YOL021C	dis3-1	Y12301	Lethal at 35°C	G465T, H488R	333
YOL034W	smc5-6	Y11207	Lethal at 37°C ~ 38.5°C		289
YOL069W	nuf2-61	Y11333	Lethal at 35°C	T338P, I340K, Y383C, L410S, K441I, M446L	334
YOL094C	rfc4-20	Y07439	Lethal at 35°C ~ 37°C		194
YOL123W	hrp1-7	Y10319	Lethal at 35°C	S64R, K92M, T125A, I163T	335
YOL123W	hrp1-1	Y11531	Lethal at 26°C ~ 30°C; sick at 22°C	N167D, F179Y, P194H, Q265L	335
YOL135C	med7-141	Y11246	Lethal at 35°C ~ 37°C		Larry Myers
YOL135C	med7-163	Y11241	Lethal at 35°C ~ 37°C		Larry Myers
YOL139C	cdc33-E72G	Y08270	Lethal at 35°C ~ 37°C	E72G	336
YOL144W	nop8-101	Y12284	Lethal at 37°C	Insertion of one A at nucleotide position +765, which causes a frameshift followed by a premature stop codon leading to a truncated protein of 257 aa	337
YOR020C	hsp10-ts	Y10708	Lethal at 35°C	P36H	338
YOR046C	dbp5-1	Y10320	Lethal at 30°C ~ 35°C	L220P, T466S	339
YOR046C	dbp5-2	Y10323	Lethal at 30°C	S171P, F236L, V345F, Stop483Q	339
YOR048C	rat1-1	Y07996	Lethal at 35°C		340
YOR057W	sgt1-5	Y09267	Lethal at 35°C ~ 37°C	D220V, E364K	341
YOR074C	cdc21-1	Y08760	Lethal at 26°C		4
YOR074C	cdc21-ts	Y07386	Lethal at 35°C		4
YOR075W	ufe1-1	Y07838	Lethal at 35°C ~ 37°C	R48G, P221L, L282S, L295P	342
YOR122C	pfy1-4	Y07938	Lethal at 35°C ~ 37°C	K66A	343
YOR122C	pfy1-13	Y07942	Lethal at 35°C	W2A	343
YOR122C	pfy1-14	Y09294	Lethal at 38.5°C	Y119A, Y125A	343
YOR149C	smp3-2	Y07816	Lethal at 38.5°C		344
YOR151C	rpb2-6	Y10791	Lethal at 35°C ~ 37°C		345
YOR157C	pup1-1	Y08142	Lethal at 38.5°C		346
YOR174W	med4-6	Y11237	Lethal at 35°C ~ 37°C		Larry Myers
YOR174W	med4-54	Y11239	Lethal at 37°C		Larry Myers
YOR181W	las17-1	Y07905	Lethal at 30°C	E112K	David Drubin
YOR181W	las17-13	Y08697	Lethal at 35°C	frame shift 612-IPMAVSNV*	David Drubin
YOR181W	las17-14	Y07921	Lethal at 37°C	W41E; L133S	David Drubin
YOR204W	ded1-199	Y10029	Lethal at 30°C ~ 35°C	G368D	347
YOR204W	ded1-95	Y10048	Lethal at 30°C ~ 35°C	T408I	348
YOR204W	ded1-F144C	Y10055	Lethal at 26°C ~ 30°C	F144C	Josette Banroques
YOR232W	mge1-100	Y09601	Lethal at 35°C	R216K	349
YOR236W	dfr1-td	Y04925	Lethal at 37°C	ts degron	397
YOR244W	esa1-1851	Y10054	Lethal at 30°C ~ 35°C; sick at 22°C	C304S	350
YOR244W	esa1-D414	Y10051	Lethal at 35°C ~ 37°C		351
YOR244W	esa1-L254P	Y10045	Lethal at 30°C	L254P	351
YOR249C	apc5-CA-PAps	Y11263	Lethal at 26°C ~ 30°C		352
YOR249C	apc5-CA	Y11265	Lethal at 35°C		352
YOR257W	cdc31-1	Y04974	Lethal at 37°C ~ 38.5°C; sick at 22°C ~ 26°C	A48T	4
YOR257W	cdc31-2	Y07395	Lethal at 35°C ~ 37°C	E133K	354
YOR257W	cdc31-5	Y07397	Lethal at 35°C		355
YOR259C	rpt4-145	Y08077	Lethal at 35°C ~ 37°C	D375A, E377A, D390A, R392A	356
YOR259C	rpt4-150	Y08066	Lethal at 35°C ~ 37°C	D406A, R407A	356
YOR272W	ytm1-1	Y11223	Lethal at 37°C ~ 38.5°C	G398D, S442N	358
YOR294W	rrs1-84	Y10743	Lethal at 35°C	D22G, D30G	359
YOR294W	rrs1-124	Y10738	Lethal at 35°C ~ 37°C	L61P	359
YOR326W	myo2-16	Y08461	Lethal at 30°C ~ 35°C	M1212T, L1471S, D1497V	360
YOR326W	myo2-14	Y08144	Lethal at 35°C	Y1451D, G1461V, L1536amber	360
YOR329C	scd5-D338	Y10074	Lethal at 35°C	deletes 338 C-terminal AA	361
YOR329C	scd5-PP1D2	Y10078	Lethal at 30°C ~ 35°C	KKVRF272-276AKAAA	362
YOR335C	ala1-1	Y07444	Lethal at 30°C ~ 35°C	R273P	363
YOR336W	kre5-ts2	Y07338	Lethal at 35°C	H103L, L517P, K548Q	364
YOR341W	rpa190-G728D	Y09885	Lethal at 35°C	G728D	365
YOR341W	rpa190-1	Y09882	Lethal at 37°C	G77D	366
YOR361C	prt1-1	Y05045	Lethal at 37°C		367
YPL010W	ret3-1	Y10747	Lethal at 35°C		135
YPL020C	ulp1-333	Y10056	Lethal at 35°C		369
YPL028W	erg10-1	Y09883	Lethal at 30°C ~ 35°C		312
YPL043W	nop4-3	Y10671	Lethal at 35°C ~ 37°C	F577L	370
YPL076W	gpi2-1-7B	Y09473	Lethal at 30°C ~ 35°C		Peter Orlean
YPL076W	gpi2-774	Y09479	Lethal at 30°C ~ 35°C		Peter Orlean
YPL082C	mot1-1033	Y08866	Lethal at 30°C ~ 35°C		371
YPL085W	sec16-2	Y06492	Lethal at 30°C		11
YPL093W	nog1-1	Y08421	Lethal at 37°C		372
YPL124W	spc29-20	Y10966	Lethal at 26°C ~ 30°C	A-70G, T-15C (these two changes are in the 5′ noncoding region), E166D, and I220T	374
YPL124W	spc29-3	Y10968	Lethal at 30°C	L158Q	375
YPL160W	cdc60-ts	Y08149	Lethal at 35°C		Mike Tyers
YPL175W	spt14-1-10C	Y09512	Lethal at 26°C ~ 30°C		377
YPL209C	ipl1-2	Y07820	Lethal at 30°C	H352Y	379
YPL209C	ipl1-1	Y07424	Lethal at 30°C ~ 35°C	P340L	379
YPL211W	nip7-1	Y06478	Lethal at 30°C	G71D	380
YPL217C	bms1-1	Y10695	Lethal at 30°C	P888L	381
YPL228W	cet1-1	Y08145	Lethal at 30°C	I530T	382
YPL228W	cet1-15	Y09184	Lethal at 35°C ~ 37°C	L519P	382
YPL228W	cet1-2	Y09179	Lethal at 30°C ~ 35°C	M108V	382
YPL233W	nsl1-5	Y09442	Lethal at 30°C	L35P, Q88R, M106T, V131I, I147N, Q158L, and N174I	148
YPL233W	nsl1-6	Y09446	Lethal at 35°C ~ 37°C	W110R, K136R, and Y182C	148
YPL252C	yah1-ts	Y09291	Lethal at 35°C ~ 37°C		383
YPL255W	bbp1-1	Y10758	Lethal at 30°C ~ 35°C	N97S, H135R, N234D,D243E	145
YPL266W	dim1-2	Y11742	Lethal at 37°C	S25G, I126V, F159S, R174S, Y220N, M273T	384
YPR025C	ccl1-ts4	Y06414	Lethal at 37°C		55
YPR033C	hts1-1	Y10345	Lethal at 35°C		Peter Piper
YPR034W	arp7-E411K	Y09594	Lethal at 30°C ~ 35°C; sick at 22°C ~ 26°C	E411K	386
YPR055W	sec8-9	Y06499	Lethal at 37°C		11
YPR055W	sec8-6	Y08867	Lethal at 35°C ~ 37°C		387
YPR103W	pre2-2	Y08009	Lethal at 38.5°C	A124V	113
YPR103W	pre2-1	Y08003	Sick at 38.5°C	G259S	113
YPR103W	pre2-127	Y08005	Sick at 38.5°C	C127F	184
YPR103W	pre2-75	Y08011	Lethal at 38.5°C	G75A	184
YPR103W	pre2-V214A	Y08078	Sick at 38.5°C	V214A	389
YPR108W	rpn7-3	Y12338	Lethal at 35°C		390
YPR110C	rpc40-V78R	Y10324	Lethal at 35°C	V78R	391
YPR133C	spn1-K192N	Y11921	Lethal at 37°C	K192N	392
YPR161C	sgv1-80	Y12298	Lethal at 35°C ~ 37°C	N5S, L155P, K374E, T379A, N550Y	393
YPR161C	sgv1-23	Y12293	Lethal at 35°C ~ 37°C	Q258R, L326Q, L334Q, K366R, I375K, Y462C, A478V, N509K	393
YPR161C	sgv1-35	Y12300	Lethal at 37°C	S45G, F70L, I147T, I200T, E316G, I387T, K470R, V482A, K522R	393
YPR165W	rho1-td	Y04720	Lethal at 37°C	ts degron	397
YPR168W	nut2-ts	Y11430	Lethal at 35°C	N2D, L61S, L64P	308
YPR175W	dpb2-1	Y08711	Lethal at 30°C ~ 35°C		394
YPR176C	bet2-1	Y07352	Lethal at 35°C		195
YPR178W	prp4-1	Y09588	Lethal at 26°C ~ 30°C		395
YPR181C	sec23-1	Y06497	Lethal at 37°C		11
YPR183W	dpm1-6	Y08422	Lethal at 35°C ~ 37°C	P157L	396

## Sheet: References
References
1	Lefebvre, O., Ruth, J. & Sentenac, A. A mutation in the largest subunit of yeast TFIIIC affects tRNA and 5 S RNA synthesis. Identification of two classes of suppressors. J Biol Chem 269, 23374-81 (1994).
2	Carr-Schmid, A. et al. Mutations in elongation factor 1beta, a guanine nucleotide exchange factor, enhance translational fidelity. Mol Cell Biol 19, 5257-66 (1999).
3	Goshima, G. & Yanagida, M. Establishing biorientation occurs with precocious separation of the sister kinetochores, but not the arms, in the early spindle of budding yeast. Cell 100, 619-33 (2000).
4	Hartwell, L. H., Mortimer, R. K., Culotti, J. & Culotti, M. Genetic Control of the Cell Division Cycle in Yeast: V. Genetic Analysis of cdc Mutants. Genetics 74, 267-286 (1973).
5	Bi, E. et al. Identification of novel, evolutionarily conserved Cdc42p-interacting proteins and of redundant pathways linking Cdc24p and Cdc42p to actin polarization in yeast. Mol Biol Cell 11, 773-93 (2000).
6	Kaback, D. B., Steensma, H. Y. & de Jonge, P. Enhanced meiotic recombination on the smallest chromosome of Saccharomyces cerevisiae. Proc Natl Acad Sci U S A 86, 3694-8 (1989).
7	Stevenson, B. J. et al. Mutation of RGA1, which encodes a putative GTPase-activating protein for the polarity-establishment protein Cdc42p, activates the pheromone-response pathway in the yeast Saccharomyces cerevisiae. Genes Dev 9, 2949-63 (1995).
8	Longhese, M. P., Plevani, P. & Lucchini, G. Replication factor A is required in vivo for DNA replication, repair, and recombination. Mol Cell Biol 14, 7884-90 (1994).
9	Garber, P. M. & Rine, J. Overlapping roles of the spindle assembly and DNA damage checkpoints in the cell-cycle response to altered chromosomes in Saccharomyces cerevisiae. Genetics 161, 521-34 (2002).
10	Yin, H., You, L., Pasqualone, D., Kopski, K. M. & Huffaker, T. C. Stu1p is physically associated with beta-tubulin and is required for structural integrity of the mitotic spindle. Mol Biol Cell 13, 1881-92 (2002).
11	Finger, F. P. & Novick, P. Synthetic interactions of the post-Golgi sec mutations of Saccharomyces cerevisiae. Genetics 156, 943-51 (2000).
12	Hartwell, L. H. & McLaughlin, C. S. Mutants of yeast with temperature-sensitive isoleucyl-tRNA synthetases. Proc Natl Acad Sci U S A 59, 422-8 (1968).
13	Rosenblum-Vos, L. S., Rhodes, L., Evangelista, C. C., Jr., Boayke, K. A. & Zitomer, R. S. The ROX3 gene encodes an essential nuclear protein involved in CYC7 gene expression in Saccharomyces cerevisiae. Mol Cell Biol 11, 5639-47 (1991).
14	Lavoie, B. D., Tuffo, K. M., Oh, S., Koshland, D. & Holm, C. Mitotic chromosome condensation requires Brn1p, the yeast homologue of Barren. Mol Biol Cell 11, 1293-304 (2000).
15	Huang, K. N. & Symington, L. S. Mutation of the gene encoding protein kinase C 1 stimulates mitotic recombination in Saccharomyces cerevisiae. Mol Cell Biol 14, 6039-45 (1994).
16	Yoshida, S. & Anraku, Y. Characterization of staurosporine-sensitive mutants of Saccharomyces cerevisiae: vacuolar functions affect staurosporine sensitivity. Mol Gen Genet 263, 877-88 (2000).
17	Hartwell, L. H., McLaughlin, C. S. & Warner, J. R. Identification of ten genes that control ribosome formation in yeast. Mol Gen Genet 109, 42-56 (1970).
18	Gable, K., Slife, H., Bacikova, D., Monaghan, E. & Dunn, T. M. Tsc3p is an 80-amino acid protein associated with serine palmitoyltransferase and required for optimal enzyme activity. J Biol Chem 275, 7597-603 (2000).
19	Foss, M., McNally, F. J., Laurenson, P. & Rine, J. Origin recognition complex (ORC) in transcriptional silencing and DNA replication in S. cerevisiae. Science 262, 1838-44 (1993).
20	Kovarik, P., Hasek, J., Valasek, L. & Ruis, H. RPG1: an essential gene of saccharomyces cerevisiae encoding a 110-kDa protein required for passage through the G1 phase. Curr Genet 33, 100-9 (1998).
21	Sugimoto, K. et al. Rfc5, a small subunit of replication factor C complex, couples DNA replication and mitosis in budding yeast. Proc Natl Acad Sci U S A 93, 7048-52 (1996).
22	Geiser, J. R., van Tuinen, D., Brockerhoff, S. E., Neff, M. M. & Davis, T. N. Can calmodulin function without binding calcium? Cell 65, 949-59 (1991).
23	Brockerhoff, S. E., Stevens, R. C. & Davis, T. N. The unconventional myosin, Myo2p, is a calmodulin target at sites of cell growth in Saccharomyces cerevisiae. J Cell Biol 124, 315-23 (1994).
24	Davis, T. N. A temperature-sensitive calmodulin mutant loses viability during mitosis. J Cell Biol 118, 607-17 (1992).
25	Huffaker, T. C. & Robbins, P. W. Temperature-sensitive yeast mutants deficient in asparagine-linked glycosylation. J Biol Chem 257, 3203-3210 (1982).
26	Jourdain, S., Acker, J., Ducrot, C., Sentenac, A. & Lefebvre, O. The tau95 subunit of yeast TFIIIC influences upstream and downstream functions of TFIIIC.DNA complexes. J Biol Chem 278, 10450-7 (2003).
27	Tang, Y. & Reed, S. I. The Cdk-associated protein Cks1 functions both in G1 and G2 in Saccharomyces cerevisiae. Genes Dev 7, 822-32 (1993).
28	Bradley, M. E., Bagriantsev, S., Vishveshwara, N. & Liebman, S. W. Guanidine reduces stop codon read-through caused by missense mutations in SUP35 or SUP45. Yeast 20, 625-32 (2003).
29	Navarro, F. & Thuriaux, P. In vivo misreading by tRNA overdose. Rna 6, 103-10 (2000).
30	Tesic, M., Marsh, J. A., Cullinan, S. B. & Gaber, R. F. Functional interactions between Hsp90 and the co-chaperones Cns1 and Cpr7 in Saccharomyces cerevisiae. J Biol Chem 278, 32692-701 (2003).
31	Kim, J. H., Kang, J. S. & Chan, C. S. Sli15 associates with the ipl1 protein kinase to promote proper chromosome segregation in Saccharomyces cerevisiae. J Cell Biol 145, 1381-94 (1999).
32	Reed, S. I. The selection of S. cerevisiae mutants defective in the start event of cell division. Genetics 95, 561-77 (1980).
33	Durso, R. J., Fisher, A. K., Albright-Frey, T. J. & Reese, J. C. Analysis of TAF90 mutants displaying allele-specific and broad defects in transcription. Mol Cell Biol 21, 7331-44 (2001).
34	Pot, I. et al. Spindle checkpoint maintenance requires Ame1 and Okp1. Cell Cycle 4, 1448-56 (2005).
35	Schwer, B., Saha, N., Mao, X., Chen, H. W. & Shuman, S. Structure-function analysis of yeast mRNA cap methyltransferase and high-copy suppression of conditional mutants by AdoMet synthase and the ubiquitin conjugating enzyme Cdc34p. Genetics 155, 1561-76 (2000).
36	Lustig, A. J., Lin, R. J. & Abelson, J. The yeast RNA gene products are essential for mRNA splicing in vitro. Cell 47, 953-63 (1986).
37	Chen, W., Bucaria, J., Band, D. A., Sutton, A. & Sternglanz, R. Enp1, a yeast protein associated with U3 and U14 snoRNAs, is required for pre-rRNA processing and 40S subunit synthesis. Nucleic Acids Res 31, 690-9 (2003).
38	Beeler, T. et al. The Saccharomyces cerevisiae TSC10/YBR265w gene encoding 3-ketosphinganine reductase is identified in a screen for temperature-sensitive suppressors of the Ca2+-sensitive csg2Delta mutant. J Biol Chem 273, 30688-94 (1998).
39	Sasaki, T., Toh, E. A. & Kikuchi, Y. Yeast Krr1p physically and functionally interacts with a novel essential Kri1p, and both proteins are required for 40S ribosome biogenesis in the nucleolus. Mol Cell Biol 20, 7971-9 (2000).
40	Shen, W. C. et al. Systematic analysis of essential yeast TAFs in genome-wide transcription and preinitiation complex assembly. Embo J 22, 3395-402 (2003).
41	Michaelis, C., Ciosk, R. & Nasmyth, K. Cohesins: chromosomal proteins that prevent premature separation of sister chromatids. Cell 91, 35-45 (1997).
42	Rubin, D. M., Glickman, M. H., Larsen, C. N., Dhruvakumar, S. & Finley, D. Active site mutants in the six regulatory particle ATPases reveal multiple roles for ATP in the proteasome. Embo J 17, 4909-19 (1998).
43	Leverson, J. D. et al. The APC11 RING-H2 finger mediates E2-dependent ubiquitination. Mol Biol Cell 11, 2315-25 (2000).
44	Tollervey, D., Lehtonen, H., Jansen, R., Kern, H. & Hurt, E. C. Temperature-sensitive mutations demonstrate roles for yeast fibrillarin in pre-rRNA processing, pre-rRNA methylation, and ribosome assembly. Cell 72, 443-57 (1993).
45	Schutz, A. R., Giddings, T. H., Jr., Steiner, E. & Winey, M. The yeast CDC37 gene interacts with MPS1 and is required for proper execution of spindle pole body duplication. J Cell Biol 136, 969-82 (1997).
46	Winey, M., Goetsch, L., Baum, P. & Byers, B. MPS1 and MPS2: novel yeast genes defining distinct steps of spindle pole body duplication. J Cell Biol 114, 745-54 (1991).
47	Schappert, K. & Friesen, J. D. Genetic studies of the PRP11 gene of Saccharomyces cerevisiae. Mol Gen Genet 226, 277-82 (1991).
48	Nakajima, H. et al. A cytoskeleton-related gene, uso1, is required for intracellular protein transport in Saccharomyces cerevisiae. J Cell Biol 113, 245-60 (1991).
49	Betting, J. & Seufert, W. A yeast Ubc9 mutant protein with temperature-sensitive in vivo function is subject to conditional proteolysis by a ubiquitin- and proteasome-dependent pathway. J Biol Chem 271, 25790-6 (1996).
50	Kistler, A. L. & Guthrie, C. Deletion of MUD2, the yeast homolog of U2AF65, can bypass the requirement for sub2, an essential spliceosomal ATPase. Genes Dev 15, 42-9 (2001).
51	Fortes, P. et al. Luc7p, a novel yeast U1 snRNP protein with a role in 5' splice site recognition. Genes Dev 13, 2425-38 (1999).
52	Isono, E., Saito, N., Kamata, N., Saeki, Y. & Toh, E. A. Functional analysis of Rpn6p, a lid component of the 26 S proteasome, using temperature-sensitive rpn6 mutants of the yeast Saccharomyces cerevisiae. J Biol Chem 280, 6537-47 (2005).
53	Reynaud, A., Facca, C., Sor, F. & Faye, G. Disruption and functional analysis of six ORFs of chromosome IV: YDL103c (QRI1), YDL105w (QRI2), YDL112w (TRM3), YDL113c, YDL116w (NUP84) and YDL167c (NRP1). Yeast 18, 273-82 (2001).
54	Hu, B. et al. Qri2/Nse4, a component of the essential Smc5/6 DNA repair complex. Mol Microbiol 55, 1735-50 (2005).
55	Bieganowski, P. et al. Adenosine monophosphoramidase activity of Hint and Hnt1 supports function of Kin28, Ccl1, and Tfb3. J Biol Chem 277, 10852-60 (2002).
56	Latterich, M., Frohlich, K. U. & Schekman, R. Membrane fusion and the cell cycle: Cdc48p participates in the fusion of ER membranes. Cell 82, 885-93 (1995).
57	Moir, D., Stewart, S. E., Osmond, B. C. & Botstein, D. Cold-sensitive cell-division-cycle mutants of yeast: isolation, properties, and pseudoreversion studies. Genetics 100, 547-63 (1982).
58	Goebl, M. G. et al. The yeast cell cycle gene CDC34 encodes a ubiquitin-conjugating enzyme. Science 241, 1331-5 (1988).
59	Nonet, M., Scafe, C., Sexton, J. & Young, R. Eucaryotic RNA polymerase conditional mutant that rapidly ceases mRNA synthesis. Mol Cell Biol 7, 1602-11 (1987).
60	Vinh, D. B. & Drubin, D. G. A yeast TCP-1-like protein is required for actin function in vivo. Proc Natl Acad Sci U S A 91, 9116-20 (1994).
61	Letourneur, F. et al. Coatomer is essential for retrieval of dilysine-tagged proteins to the endoplasmic reticulum. Cell 79, 1199-207 (1994).
62	Isono, E. et al. The assembly pathway of the 19S regulatory particle of the yeast 26S proteasome. Mol Biol Cell 18, 569-80 (2007).
63	Wuestehube, L. J. et al. New mutants of Saccharomyces cerevisiae affected in the transport of proteins from the endoplasmic reticulum to the Golgi complex. Genetics 142, 393-406 (1996).
64	Bolger, T. A., Folkmann, A. W., Tran, E. J. & Wente, S. R. The mRNA export factor Gle1 and inositol hexakisphosphate regulate distinct stages of translation. Cell 134, 624-33 (2008).
65	Vincent, K., Wang, Q., Jay, S., Hobbs, K. & Rymond, B. C. Genetic interactions with CLF1 identify additional pre-mRNA splicing factors and a link between activators of yeast vesicular transport and splicing. Genetics 164, 895-907 (2003).
66	Curran, S. P. et al. The role of Hot13p and redox chemistry in the mitochondrial TIM22 import pathway. J Biol Chem 279, 43744-51 (2004).
67	Kunzler, M., Gerstberger, T., Stutz, F., Bischoff, F. R. & Hurt, E. Yeast Ran-binding protein 1 (Yrb1) shuttles between the nucleus and cytoplasm and is exported from the nucleus via a CRM1 (XPO1)-dependent pathway. Mol Cell Biol 20, 4295-308 (2000).
68	Takayama, Y. et al. GINS, a novel multiprotein complex required for chromosomal DNA replication in budding yeast. Genes Dev 17, 1153-65 (2003).
69	Kressler, D., de la Cruz, J., Rojo, M. & Linder, P. Fal1p is an essential DEAD-box protein involved in 40S-ribosomal-subunit biogenesis in Saccharomyces cerevisiae. Mol Cell Biol 17, 7283-94 (1997).
70	Chapman, J. W. & Johnston, L. H. The yeast gene, DBF4, essential for entry into S phase is cell cycle regulated. Exp Cell Res 180, 419-28 (1989).
71	Kitada, K., Johnston, L. H., Sugino, T. & Sugino, A. Temperature-sensitive cdc7 mutations of Saccharomyces cerevisiae are suppressed by the DBF4 gene, which is required for the G1/S cell cycle transition. Genetics 131, 21-9 (1992).
72	Dumas, L. B., Lussky, J. P., McFarland, E. J. & Shampay, J. New temperature-sensitive mutants of Saccharomyces cerevisiae affecting DNA replication. Mol Gen Genet 187, 42-6 (1982).
73	Liu, Y., Mathias, N., Steussy, C. N. & Goebl, M. G. Intragenic suppression among CDC34 (UBC3) mutations defines a class of ubiquitin-conjugating catalytic domains. Mol Cell Biol 15, 5635-44 (1995).
74	Milkereit, P. et al. Maturation and intranuclear transport of pre-ribosomes requires Noc proteins. Cell 105, 499-509 (2001).
75	Grandin, N., Reed, S. I. & Charbonneau, M. Stn1, a new Saccharomyces cerevisiae protein, is implicated in telomere size regulation in association with Cdc13. Genes Dev 11, 512-27 (1997).
76	Fabian, G. R. & Hopper, A. K. RRP1, a Saccharomyces cerevisiae gene affecting rRNA processing and production of mature ribosomal subunits. J Bacteriol 169, 1571-8 (1987).
77	James, S. A., Turner, W. & Schwer, B. How Slu7 and Prp18 cooperate in the second step of yeast pre-mRNA splicing. Rna 8, 1068-77 (2002).
78	Clarke, D. J. et al. Dosage suppressors of pds1 implicate ubiquitin-associated domains in checkpoint control. Mol Cell Biol 21, 1997-2007 (2001).
79	Kobayashi, A., Miyake, T., Kawaichi, M. & Kokubo, T. Mutations in the histone fold domain of the TAF12 gene show synthetic lethality with the TAF1 gene lacking the TAF N-terminal domain (TAND) by different mechanisms from those in the SPT15 gene encoding the TATA box-binding protein (TBP). Nucleic Acids Res 31, 1261-74 (2003).
80	Reese, J. C., Zhang, Z. & Kurpad, H. Identification of a yeast transcription factor IID subunit, TSG2/TAF48. J Biol Chem 275, 17391-8 (2000).
81	Sanders, S. L., Klebanow, E. R. & Weil, P. A. TAF25p, a non-histone-like subunit of TFIID and SAGA complexes, is essential for total mRNA gene transcription in vivo. J Biol Chem 274, 18847-50 (1999).
82	Lin, P., Cardillo, T. S., Richard, L. M., Segel, G. B. & Sherman, F. Analysis of mutationally altered forms of the Cct6 subunit of the chaperonin from Saccharomyces cerevisiae. Genetics 147, 1609-33 (1997).
83	Cao, X. & Barlowe, C. Asymmetric requirements for a Rab GTPase and SNARE proteins in fusion of COPII vesicles with acceptor membranes. J Cell Biol 149, 55-66 (2000).
84	Stefan, C. J., Audhya, A. & Emr, S. D. The yeast synaptojanin-like proteins control the cellular distribution of phosphatidylinositol (4,5)-bisphosphate. Mol Biol Cell 13, 542-57 (2002).
85	Ursic, D., Sedbrook, J. C., Himmel, K. L. & Culbertson, M. R. The essential yeast Tcp1 protein affects actin and microtubules. Mol Biol Cell 5, 1065-80 (1994).
86	Amrani, N. et al. PCF11 encodes a third protein component of yeast cleavage and polyadenylation factor I. Mol Cell Biol 17, 1102-9 (1997).
87	DeRegis, C. J., Rahl, P. B., Hoffman, G. R., Cerione, R. A. & Collins, R. N. Mutational analysis of betaCOP (Sec26p) identifies an appendage domain critical for function. BMC Cell Biol 9, 3 (2008).
88	Hoffman, G. R., Rahl, P. B., Collins, R. N. & Cerione, R. A. Conserved structural motifs in intracellular trafficking pathways: structure of the gammaCOP appendage domain. Mol Cell 12, 615-25 (2003).
89	Chang, T. H., Latus, L. J., Liu, Z. & Abbott, J. M. Genetic interactions of conserved regions in the DEAD-box protein Prp28p. Nucleic Acids Res 25, 5033-40 (1997).
90	Prinz, W. A. et al. Mutants affecting the structure of the cortical endoplasmic reticulum in Saccharomyces cerevisiae. J Cell Biol 150, 461-74 (2000).
91	Angus-Hill, M. L. et al. A Rsc3/Rsc30 zinc cluster dimer reveals novel roles for the chromatin remodeler RSC in gene expression and cell cycle control. Mol Cell 7, 741-51 (2001).
92	Matsui, P., DePaulo, J. & Buratowski, S. An interaction between the Tfb1 and Ssl1 subunits of yeast TFIIH correlates with DNA repair activity. Nucleic Acids Res 23, 767-72 (1995).
93	Lavoie, B. D., Hogan, E. & Koshland, D. In vivo dissection of the chromosome condensation machinery: reversibility of condensation distinguishes contributions of condensin and cohesin. J Cell Biol 156, 805-15 (2002).
94	Connelly, C. & Hieter, P. Budding yeast SKP1 encodes an evolutionarily conserved kinetochore protein required for cell cycle progression. Cell 86, 275-85 (1996).
95	Sundberg, H. A., Goetsch, L., Byers, B. & Davis, T. N. Role of calmodulin and Spc110p interaction in the proper assembly of spindle pole body compenents. J Cell Biol 133, 111-24 (1996).
96	Audhya, A. & Emr, S. D. Regulation of PI4,5P2 synthesis by nuclear-cytoplasmic shuttling of the Mss4 lipid kinase. Embo J 22, 4223-36 (2003).
97	Arrebola, R. et al. Tau91, an essential subunit of yeast transcription factor IIIC, cooperates with tau138 in DNA binding. Mol Cell Biol 18, 1-9 (1998).
98	Hendricks, K. B., Wang, B. Q., Schnieders, E. A. & Thorner, J. Yeast homologue of neuronal frequenin is a regulator of phosphatidylinositol-4-OH kinase. Nat Cell Biol 1, 234-41 (1999).
99	Campbell, C. L., Tanaka, N., White, K. H. & Thorsness, P. E. Mitochondrial morphological and functional defects in yeast caused by yme1 are suppressed by mutation of a 26S protease subunit homologue. Mol Biol Cell 5, 899-905 (1994).
100	Newman, H. A. et al. Gpi19, the Saccharomyces cerevisiae homologue of mammalian PIG-P, is a subunit of the initial enzyme for glycosylphosphatidylinositol anchor biosynthesis. Eukaryot Cell 4, 1801-7 (2005).
101	Feaver, W. J. et al. Subunit interactions in yeast transcription/repair factor TFIIH. Requirement for Tfb3 subunit in nucleotide excision repair. J Biol Chem 275, 5941-6 (2000).
102	Vijayraghavan, U., Company, M. & Abelson, J. Isolation and characterization of pre-mRNA splicing mutants of Saccharomyces cerevisiae. Genes Dev 3, 1206-16 (1989).
103	Cai, T., Reilly, T. R., Cerio, M. & Schmitt, M. E. Mutagenesis of SNM1, which encodes a protein component of the yeast RNase MRP, reveals a role for this ribonucleoprotein endoribonuclease in plasmid segregation. Mol Cell Biol 19, 7857-69 (1999).
104	Biggins, S., Bhalla, N., Chang, A., Smith, D. L. & Murray, A. W. Genes involved in sister chromatid separation and segregation in the budding yeast Saccharomyces cerevisiae. Genetics 159, 453-70 (2001).
105	te Heesen, S., Janetzky, B., Lehle, L. & Aebi, M. The yeast WBP1 is essential for oligosaccharyl transferase activity in vivo and in vitro. Embo J 11, 2071-5 (1992).
106	Montelone, B. A., Prakash, S. & Prakash, L. Hyper-recombination and mutator effects of the mms9-1, mms13-1, and mms21-1 mutations in Saccharomyces cerevisiae. Curr. Genet. 4, 223-232 (1981).
107	Dobbyn, H. C. et al. Analysis of pre-mRNA and pre-rRNA processing factor Snu13p structure and mutants. Biochem Biophys Res Commun 360, 857-62 (2007).
108	Valentini, S. R., Casolari, J. M., Oliveira, C. C., Silver, P. A. & McBride, A. E. Genetic interactions of yeast eukaryotic translation initiation factor 5A (eIF5A) reveal connections to poly(A)-binding protein and protein kinase C signaling. Genetics 160, 393-405 (2002).
109	Zuk, D. & Jacobson, A. A single amino acid substitution in yeast eIF-5A results in mRNA stabilization. Embo J 17, 2914-25 (1998).
110	Shimizu, K. et al. The fifth essential DNA polymerase phi in Saccharomyces cerevisiae is localized to the nucleolus and plays an important role in synthesis of rRNA. Proc Natl Acad Sci U S A 99, 9133-8 (2002).
111	Bassler, J. et al. Identification of a 60S preribosomal particle that is closely linked to nuclear export. Mol Cell 8, 517-29 (2001).
112	Ryan, K. J., McCaffery, J. M. & Wente, S. R. The Ran GTPase cycle is required for yeast nuclear pore complex assembly. J Cell Biol 160, 1041-53 (2003).
113	Heinemeyer, W., Gruhler, A., Mohrle, V., Mahe, Y. & Wolf, D. H. PRE2, highly homologous to the human major histocompatibility complex-linked RING10 gene, codes for a yeast proteasome subunit necessary for chrymotryptic activity and degradation of ubiquitinated proteins. J Biol Chem 268, 5115-20 (1993).
114	Wigge, P. A. & Kilmartin, J. V. The Ndc80p complex from Saccharomyces cerevisiae contains conserved centromere components and has a function in chromosome segregation. J Cell Biol 152, 349-60 (2001).
115	Koh, S. S., Ansari, A. Z., Ptashne, M. & Young, R. A. An activator target in the RNA polymerase II holoenzyme. Mol Cell 1, 895-904 (1998).
116	Neumann, S. et al. Formation and nuclear export of tRNA, rRNA and mRNA is regulated by the ubiquitin ligase Rsp5p. EMBO Rep 4, 1156-62 (2003).
117	Fisk, H. A. & Yaffe, M. P. A role for ubiquitination in mitochondrial inheritance in Saccharomyces cerevisiae. J Cell Biol 145, 1199-208 (1999).
118	Andrews, P. D. & Stark, M. J. Type 1 protein phosphatase is required for maintenance of cell wall integrity, morphogenesis and cell cycle progression in Saccharomyces cerevisiae. J Cell Sci 113 ( Pt 3), 507-20 (2000).
119	Ciosk, R. et al. Cohesin's binding to chromosomes depends on a separate complex consisting of Scc2 and Scc4 proteins. Mol Cell 5, 243-54 (2000).
120	Colbert, T. & Hahn, S. A yeast TFIIB-related factor involved in RNA polymerase III transcription. Genes Dev 6, 1940-9 (1992).
121	Aebi, M. et al. Isolation of a temperature-sensitive mutant with an altered tRNA nucleotidyltransferase and cloning of the gene encoding tRNA nucleotidyltransferase in the yeast Saccharomyces cerevisiae. J Biol Chem 265, 16216-20 (1990).
122	Strunnikov, A. V., Larionov, V. L. & Koshland, D. SMC1: an essential yeast gene encoding a putative head-rod-tail protein is required for nuclear division and defines a new ubiquitous protein family. J Cell Biol 123, 1635-48 (1993).
123	Lin, R., Allis, C. D. & Elledge, S. J. PAT1, an evolutionarily conserved acetyltransferase homologue, is required for multiple steps in the cell cycle. Genes Cells 1, 923-42 (1996).
124	Espinoza, F. H. et al. Cak1 is required for Kin28 phosphorylation and activation in vivo. Mol Cell Biol 18, 6365-73 (1998).
125	Cao, X., Ballew, N. & Barlowe, C. Initial docking of ER-derived vesicles requires Uso1p and Ypt1p but is independent of SNARE proteins. Embo J 17, 2156-65 (1998).
126	Wertman, K. F., Drubin, D. G. & Botstein, D. Systematic mutational analysis of the yeast ACT1 gene. Genetics 132, 337-50 (1992).
127	Belmont, L. D., Patterson, G. M. & Drubin, D. G. New actin mutants allow further characterization of the nucleotide binding cleft and drug binding sites. J Cell Sci 112 ( Pt 9), 1325-36 (1999).
128	Belmont, L. D. & Drubin, D. G. The yeast V159N actin mutant reveals roles for actin dynamics in vivo. J Cell Biol 142, 1289-99 (1998).
129	Ferro-Novick, S., Novick, P., Field, C. & Schekman, R. Yeast secretory mutants that block the formation of active cell surface enzymes. J Cell Biol 98, 35-43 (1984).
130	Stitzel, M. L., Durso, R. & Reese, J. C. The proteasome regulates the UV-induced activation of the AP-1-like transcription factor Gcn4. Genes Dev 15, 128-33 (2001).
131	Lygerou, Z., Christophides, G. & Seraphin, B. A novel genetic screen for snRNP assembly factors in yeast identifies a conserved protein, Sad1p, also required for pre-mRNA splicing. Mol Cell Biol 19, 2008-20 (1999).
132	Toth, A. et al. Yeast cohesin complex requires a conserved protein, Eco1p(Ctf7), to establish cohesion between sister chromatids during DNA replication. Genes Dev 13, 320-33 (1999).
133	Strunnikov, A. V., Hogan, E. & Koshland, D. SMC2, a Saccharomyces cerevisiae gene essential for chromosome segregation and condensation, defines a subgroup within the SMC family. Genes Dev 9, 587-99 (1995).
134	Treich, I., Ho, L. & Carlson, M. Direct interaction between Rsc6 and Rsc8/Swh3,two proteins that are conserved in SWI/SNF-related complexes. Nucleic Acids Res 26, 3739-45 (1998).
135	Cosson, P., Demolliere, C., Hennecke, S., Duden, R. & Letourneur, F. Delta- and zeta-COP, two coatomer subunits homologous to clathrin-associated proteins, are involved in ER retrieval. Embo J 15, 1792-8 (1996).
136	Kominami, K. et al. Nin1p, a regulatory subunit of the 26S proteasome, is necessary for activation of Cdc28p kinase of Saccharomyces cerevisiae. Embo J 14, 3105-15 (1995).
137	Baudry, K. et al. The effect of the erg26-1 mutation on the regulation of lipid metabolism in Saccharomyces cerevisiae. J Biol Chem 276, 12702-11 (2001).
138	Spirig, U. et al. The STT3 protein is a component of the yeast oligosaccharyltransferase complex. Mol Gen Genet 256, 628-37 (1997).
139	Hammell, C. M. et al. Coupling of termination, 3' processing, and mRNA export. Mol Cell Biol 22, 6441-57 (2002).
140	Xu, Q., Singer, R. A. & Johnston, G. C. Sug1 modulates yeast transcription activation by Cdc68. Mol Cell Biol 15, 6025-35 (1995).
141	Ghislain, M., Udvardy, A. & Mann, C. S. cerevisiae 26S protease mutants arrest cell division in G2/metaphase. Nature 366, 358-62 (1993).
142	McConnell, S. J., Stewart, L. C., Talin, A. & Yaffe, M. P. Temperature-sensitive yeast mutants defective in mitochondrial inheritance. J Cell Biol 111, 967-76 (1990).
143	Cheeseman, I. M., Enquist-Newman, M., Muller-Reichert, T., Drubin, D. G. & Barnes, G. Mitotic spindle integrity and kinetochore function linked by the Duo1p/Dam1p complex. J Cell Biol 152, 197-212 (2001).
144	Huffaker, T. C. & Robbins, P. W. Yeast mutants deficient in protein glycosylation. Proc Natl Acad Sci U S A 80, 7466-70 (1983).
145	Schramm, C., Elliott, S., Shevchenko, A. & Schiebel, E. The Bbp1p-Mps2p complex connects the SPB to the nuclear envelope and is essential for SPB duplication. Embo J 19, 421-33 (2000).
146	Emtage, J. L., Bucci, M., Watkins, J. L. & Wente, S. R. Defining the essential functional regions of the nucleoporin Nup145p. J Cell Sci 110 ( Pt 7), 911-25 (1997).
147	Wente, S. R. & Blobel, G. NUP145 encodes a novel yeast glycine-leucine-phenylalanine-glycine (GLFG) nucleoporin required for nuclear envelope structure. J Cell Biol 125, 955-69 (1994).
148	Nekrasov, V. S., Smith, M. A., Peak-Chew, S. & Kilmartin, J. V. Interactions between centromere complexes in Saccharomyces cerevisiae. Mol Biol Cell 14, 4931-46 (2003).
149	Aebi, M., Clark, M. W., Vijayraghavan, U. & Abelson, J. A yeast mutant, PRP20, altered in mRNA metabolism and maintenance of the nuclear structure, is defective in a gene homologous to the human gene RCC1 which is involved in the control of chromosome condensation. Mol Gen Genet 224, 72-80 (1990).
150	Dilcher, M. et al. Use1p is a yeast SNARE protein required for retrograde traffic to the ER. Embo J 22, 3664-74 (2003).
151	Martin, A., Schneider, S. & Schwer, B. Prp43 is an essential RNA-dependent ATPase required for release of lariat-intron from the spliceosome. J Biol Chem 277, 17743-50 (2002).
152	Fresco, L. D. & Buratowski, S. Conditional mutants of the yeast mRNA capping enzyme show that the cap enhances, but is not required for, mRNA splicing. Rna 2, 584-96 (1996).
153	Schwer, B. & Shuman, S. Multicopy suppressors of temperature-sensitive mutations of yeast mRNA capping enzyme. Gene Expr 5, 331-44 (1996).
154	Duden, R. et al. Yeast beta- and beta'-coat proteins (COP). Two coatomer subunits essential for endoplasmic reticulum-to-Golgi protein traffic. J Biol Chem 269, 24486-95 (1994).
155	Kamena, F. & Spang, A. Tip20p prohibits back-fusion of COPII vesicles with the endoplasmic reticulum. Science 304, 286-9 (2004).
156	Adams, A. E., Johnson, D. I., Longnecker, R. M., Sloat, B. F. & Pringle, J. R. CDC42 and CDC43, two additional genes involved in budding and the establishment of cell polarity in the yeast Saccharomyces cerevisiae. J Cell Biol 111, 131-42 (1990).
157	Hoppe, T. et al. Activation of a membrane-bound transcription factor by regulated ubiquitin/proteasome-dependent processing. Cell 102, 577-86 (2000).
158	Xue, D., Rubinson, D. A., Pannone, B. K., Yoo, C. J. & Wolin, S. L. U snRNP assembly in yeast involves the La protein. Embo J 19, 1650-60 (2000).
159	Blanton, S., Srinivasan, A. & Rymond, B. C. PRP38 encodes a yeast protein required for pre-mRNA splicing and maintenance of stable U6 small nuclear RNA levels. Mol Cell Biol 12, 3939-47 (1992).
160	Weidenhammer, E. M., Singh, M., Ruiz-Noriega, M. & Woolford, J. L., Jr. The PRP31 gene encodes a novel protein required for pre-mRNA splicing in Saccharomyces cerevisiae. Nucleic Acids Res 24, 1164-70 (1996).
161	Donovan, J. D., Toyn, J. H., Johnson, A. L. & Johnston, L. H. P40SDB25, a putative CDK inhibitor, has a role in the M/G1 transition in Saccharomyces cerevisiae. Genes Dev 8, 1640-53 (1994).
162	Johnston, L. H. & Thomas, A. P. The isolation of new DNA synthesis mutants in the yeast Saccharomyces cerevisiae. Mol Gen Genet 186, 439-44 (1982).
163	Ciosk, R. et al. An ESP1/PDS1 complex regulates loss of sister chromatid cohesion at the metaphase to anaphase transition in yeast. Cell 93, 1067-76 (1998).
164	Adams, C. C., Jakovljevic, J., Roman, J., Harnpicharnchai, P. & Woolford, J. L., Jr. Saccharomyces cerevisiae nucleolar protein Nop7p is necessary for biogenesis of 60S ribosomal subunits. Rna 8, 150-65 (2002).
165	Hartzog, G. A., Wada, T., Handa, H. & Winston, F. Evidence that Spt4, Spt5, and Spt6 control transcription elongation by RNA polymerase II in Saccharomyces cerevisiae. Genes Dev 12, 357-69 (1998).
166	Bucci, M. & Wente, S. R. A novel fluorescence-based genetic strategy identifies mutants of Saccharomyces cerevisiae defective for nuclear pore complex assembly. Mol Biol Cell 9, 2439-61 (1998).
167	Ram, R. J., Li, B. & Kaiser, C. A. Identification of Sec36p, Sec37p, and Sec38p: components of yeast complex that contains Sec34p and Sec35p. Mol Biol Cell 13, 1484-500 (2002).
168	Goh, P. Y. & Kilmartin, J. V. NDC10: a gene involved in chromosome segregation in Saccharomyces cerevisiae. J Cell Biol 121, 503-12 (1993).
169	Kopski, K. M. & Huffaker, T. C. Suppressors of the ndc10-2 mutation: a role for the ubiquitin system in Saccharomyces cerevisiae kinetochore function. Genetics 147, 409-20 (1997).
170	Strunnikov, A. V., Kingsbury, J. & Koshland, D. CEP3 encodes a centromere protein of Saccharomyces cerevisiae. J Cell Biol 128, 749-60 (1995).
171	Skaar, D. A. & Greenleaf, A. L. The RNA polymerase II CTD kinase CTDK-I affects pre-mRNA 3' cleavage/polyadenylation through the processing component Pti1p. Mol Cell 10, 1429-39 (2002).
172	Allmang, C. et al. The yeast exosome and human PM-Scl are related complexes of 3' --> 5' exonucleases. Genes Dev 13, 2148-58 (1999).
173	Chen, C. Z. et al. Genetic analysis of yeast Yip1p function reveals a requirement for Golgi-localized rab proteins and rab-Guanine nucleotide dissociation inhibitor. Genetics 168, 1827-41 (2004).
174	Ortiz, J., Stemmann, O., Rank, S. & Lechner, J. A putative protein complex consisting of Ctf19, Mcm21, and Okp1 represents a missing link in the budding yeast kinetochore. Genes Dev 13, 1140-55 (1999).
175	Sarkar, S., Azad, A. K. & Hopper, A. K. Nuclear tRNA aminoacylation and its role in nuclear export of endogenous tRNAs in Saccharomyces cerevisiae. Proc Natl Acad Sci U S A 96, 14366-71 (1999).
176	Ansari, H., Greco, G. & Luban, J. Cyclophilin A peptidyl-prolyl isomerase activity promotes ZPR1 nuclear export. Mol Cell Biol 22, 6993-7003 (2002).
177	Stade, K., Ford, C. S., Guthrie, C. & Weis, K. Exportin 1 (Crm1p) is an essential nuclear export factor. Cell 90, 1041-50 (1997).
178	Zimmerman, Z. A. & Kellogg, D. R. The Sda1 protein is required for passage through start. Mol Biol Cell 12, 201-19 (2001).
179	Hahn, S. & Roberts, S. The zinc ribbon domains of the general transcription factors TFIIB and Brf: conserved functional surfaces but different roles in transcription initiation. Genes Dev 14, 719-30 (2000).
180	McLaughlin, C. S. & Hartwell, L. H. A mutant of yeast with a defective methionyl-tRNA synthetase. Genetics 61, 557-66 (1969).
181	Walker, S. S., Reese, J. C., Apone, L. M. & Green, M. R. Transcription activation in cells lacking TAFIIS. Nature 383, 185-8 (1996).
182	Blackwell, E. et al. Effect of the pheromone-responsive G(alpha) and phosphatase proteins of Saccharomyces cerevisiae on the subcellular localization of the Fus3 mitogen-activated protein kinase. Mol Cell Biol 23, 1135-50 (2003).
183	Jensen, R. E. & Yaffe, M. P. Import of proteins into yeast mitochondria: the nuclear MAS2 gene encodes a component of the processing protease that is homologous to the MAS1-encoded subunit. Embo J 7, 3863-71 (1988).
184	Funakoshi, M., Sasaki, T., Nishimoto, T. & Kobayashi, H. Budding yeast Dsk2p is a polyubiquitin-binding protein that can interact with the proteasome. Proc Natl Acad Sci U S A 99, 745-50 (2002).
185	Saitoh, Y. H., Ogawa, K. & Nishimoto, T. Brl1p -- a novel nuclear envelope protein required for nuclear transport. Traffic 6, 502-17 (2005).
186	Jager, S., Strayle, J., Heinemeyer, W. & Wolf, D. H. Cic1, an adaptor protein specifically linking the 26S proteasome to its substrate, the SCF component Cdc4. Embo J 20, 4423-31 (2001).
187	Lee, Y. C., Min, S., Gim, B. S. & Kim, Y. J. A transcriptional mediator protein that is required for activation of many RNA polymerase II promoters and is conserved from yeast to humans. Mol Cell Biol 17, 4622-32 (1997).
188	Mitchell, P., Petfalski, E. & Tollervey, D. The 3' end of yeast 5.8S rRNA is generated by an exonuclease processing mechanism. Genes Dev 10, 502-13 (1996).
189	Milenkovic, D. et al. Sam35 of the mitochondrial protein sorting and assembly machinery is a peripheral outer membrane protein essential for cell viability. J Biol Chem 279, 22781-5 (2004).
190	Caesar, S., Greiner, M. & Schlenstedt, G. Kap120 functions as a nuclear import receptor for ribosome assembly factor Rpf1 in yeast. Mol Cell Biol 26, 3170-80 (2006).
191	Budd, M. E. & Campbell, J. L. A yeast gene required for DNA replication encodes a protein with homology to DNA helicases. Proc Natl Acad Sci U S A 92, 7642-6 (1995).
192	Ho, J. H. & Johnson, A. W. NMD3 encodes an essential cytoplasmic protein required for stable 60S ribosomal subunits in Saccharomyces cerevisiae. Mol Cell Biol 19, 2389-99 (1999).
193	Araki, T., Uesono, Y., Oguchi, T. & Toh, E. A. LAS24/KOG1, a component of the TOR complex 1 (TORC1), is needed for resistance to local anesthetic tetracaine and normal distribution of actin cytoskeleton in yeast. Genes Genet Syst 80, 325-43 (2005).
194	Mayer, M. L., Gygi, S. P., Aebersold, R. & Hieter, P. Identification of RFC(Ctf18p, Ctf8p, Dcc1p): an alternative RFC complex required for sister chromatid cohesion in S. cerevisiae. Mol Cell 7, 959-70 (2001).
195	Newman, A. P. & Ferro-Novick, S. Characterization of new mutants in the early part of the yeast secretory pathway isolated by a [3H]mannose suicide selection. J Cell Biol 105, 1587-94 (1987).
196	Kolodziej, P. A., Woychik, N., Liao, S. M. & Young, R. A. RNA polymerase II subunit composition, stoichiometry, and phosphorylation. Mol Cell Biol 10, 1915-20 (1990).
197	Bomer, U. et al. Separation of structural and dynamic functions of the mitochondrial translocase: Tim44 is crucial for the inner membrane import sites in translocation of tightly folded domains, but not of loosely folded preproteins. Embo J 17, 4226-37 (1998).
198	Kaiser, P., Sia, R. A., Bardes, E. G., Lew, D. J. & Reed, S. I. Cdc34 and the F-box protein Met30 are required for degradation of the Cdk-inhibitory kinase Swe1. Genes Dev 12, 2587-97 (1998).
199	Yen, J. L., Su, N. Y. & Kaiser, P. The yeast ubiquitin ligase SCFMet30 regulates heavy metal response. Mol Biol Cell 16, 1872-82 (2005).
200	Hua, Z. & Graham, T. R. Requirement for neo1p in retrograde transport from the Golgi complex to the endoplasmic reticulum. Mol Biol Cell 14, 4971-83 (2003).
201	Gorsch, L. C., Dockendorff, T. C. & Cole, C. N. A conditional allele of the novel repeat-containing yeast nucleoporin RAT7/NUP159 causes both rapid cessation of mRNA export and reversible clustering of nuclear pore complexes. J Cell Biol 129, 939-55 (1995).
202	Imai, J., Toh-e, A. & Matsui, Y. Genetic analysis of the Saccharomyces cerevisiae RHO3 gene, encoding a rho-type small GTPase, provides evidence for a role in bud formation. Genetics 142, 359-69 (1996).
203	Du, J., Nasir, I., Benton, B. K., Kladde, M. P. & Laurent, B. C. Sth1p, a Saccharomyces cerevisiae Snf2p/Swi2p homolog, is an essential ATPase in RSC and differs from Snf/Swi in its interactions with histones and chromatin-associated proteins. Genetics 150, 987-1005 (1998).
204	Qiu, H., Park, E., Prakash, L. & Prakash, S. The Saccharomyces cerevisiae DNA repair gene RAD25 is required for transcription by RNA polymerase II. Genes Dev 7, 2161-71 (1993).
205	Wigge, P. A. et al. Analysis of the Saccharomyces spindle pole by matrix-assisted laser desorption/ionization (MALDI) mass spectrometry. J Cell Biol 141, 967-77 (1998).
206	Escote, X., Zapater, M., Clotet, J. & Posas, F. Hog1 mediates cell-cycle arrest in G1 phase by the dual targeting of Sic1. Nat Cell Biol 6, 997-1002 (2004).
207	Merchant, A. M., Kawasaki, Y., Chen, Y., Lei, M. & Tye, B. K. A lesion in the DNA replication initiation factor Mcm10 induces pausing of elongation forks through chromosomal replication origins in Saccharomyces cerevisiae. Mol Cell Biol 17, 3261-71 (1997).
208	Araki, Y., Kawasaki, Y., Sasanuma, H., Tye, B. K. & Sugino, A. Budding yeast mcm10/dna43 mutant requires a novel repair pathway for viability. Genes Cells 8, 465-80 (2003).
209	Tang, H. Y. & Cai, M. The EH-domain-containing protein Pan1 is required for normal organization of the actin cytoskeleton in Saccharomyces cerevisiae. Mol Cell Biol 16, 4897-914 (1996).
210	Marini, F. et al. A role for DNA primase in coupling DNA replication to DNA damage response. Embo J 16, 639-50 (1997).
211	Gueckel, R., Enenkel, C., Wolf, D. H. & Hilt, W. Mutations in the yeast proteasome beta-type subunit Pre3 uncover position-dependent effects on proteasomal peptidase activity and in vivo function. J Biol Chem 273, 19443-52 (1998).
212	Silberstein, S., Schlenstedt, G., Silver, P. A. & Gilmore, R. A role for the DnaJ homologue Scj1p in protein folding in the yeast endoplasmic reticulum. J Cell Biol 143, 921-33 (1998).
213	Matsumoto, K., Uno, I., Oshima, Y. & Ishikawa, T. Isolation and characterization of yeast mutants deficient in adenylate cyclase and cAMP-dependent protein kinase. Proc Natl Acad Sci U S A 79, 2355-9 (1982).
214	Jaspersen, S. L., Giddings, T. H., Jr. & Winey, M. Mps3p is a novel component of the yeast spindle pole body that interacts with the yeast centrin homologue Cdc31p. J Cell Biol 159, 945-56 (2002).
215	Rose, M. D., Misra, L. M. & Vogel, J. P. KAR2, a karyogamy gene, is the yeast homolog of the mammalian BiP/GRP78 gene. Cell 57, 1211-21 (1989).
216	Kosova, B., Pante, N., Rollenhagen, C. & Hurt, E. Nup192p is a conserved nucleoporin with a preferential location at the inner site of the nuclear membrane. J Biol Chem 274, 22646-51 (1999).
217	Liang, S., Hitomi, M., Hu, Y. H., Liu, Y. & Tartakoff, A. M. A DEAD-box-family protein is required for nucleocytoplasmic transport of yeast mRNA. Mol Cell Biol 16, 5139-46 (1996).
218	Donze, D., Adams, C. R., Rine, J. & Kamakaka, R. T. The boundaries of the silenced HMR domain in Saccharomyces cerevisiae. Genes Dev 13, 698-708 (1999).
219	Gorzer, I. et al. The nuclear actin-related protein Act3p/Arp4p of Saccharomyces cerevisiae is involved in transcription regulation of stress genes. Mol Microbiol 50, 1155-71 (2003).
220	He, B. et al. Exo70p mediates the secretion of specific exocytic vesicles at early stages of the cell cycle for polarized cell growth. J Cell Biol 176, 771-7 (2007).
221	Kamimura, Y., Masumoto, H., Sugino, A. & Araki, H. Sld2, which interacts with Dpb11 in Saccharomyces cerevisiae, is required for chromosomal DNA replication. Mol Cell Biol 18, 6102-9 (1998).
222	Umemura, M. et al. GWT1 gene is required for inositol acylation of glycosylphosphatidylinositol anchors in yeast. J Biol Chem 278, 23639-47 (2003).
223	Frazier, A. E. et al. Pam16 has an essential role in the mitochondrial protein import motor. Nat Struct Mol Biol 11, 226-33 (2004).
224	Maniar, H. S., Wilson, R. & Brill, S. J. Roles of replication protein-A subunits 2 and 3 in DNA replication fork movement in Saccharomyces cerevisiae. Genetics 145, 891-902 (1997).
225	Sugimoto, K., Sakamoto, Y., Takahashi, O. & Matsumoto, K. HYS2, an essential gene required for DNA replication in Saccharomyces cerevisiae. Nucleic Acids Res 23, 3493-500 (1995).
226	Wu, X. et al. The Ess1 prolyl isomerase is linked to chromatin remodeling complexes and the general transcription machinery. Embo J 19, 3727-38 (2000).
227	Gambill, B. D. et al. A dual role for mitochondrial heat shock protein 70 in membrane translocation of preproteins. J Cell Biol 123, 109-17 (1993).
228	Martin, A. C. et al. Effects of Arp2 and Arp3 nucleotide-binding pocket mutations on Arp2/3 complex function. J Cell Biol 168, 315-28 (2005).
229	Noskov, V. N., Araki, H. & Sugino, A. The RFC2 gene, encoding the third-largest subunit of the replication factor C complex, is required for an S-phase checkpoint in Saccharomyces cerevisiae. Mol Cell Biol 18, 4914-23 (1998).
230	Wooding, S. & Pelham, H. R. The dynamics of golgi protein traffic visualized in living yeast cells. Mol Biol Cell 9, 2667-80 (1998).
231	Saveanu, C. et al. The p21-activated protein kinase inhibitor Skb15 and its budding yeast homologue are 60S ribosome assembly factors. Mol Cell Biol 27, 2897-909 (2007).
232	Sakurai, H., Ohishi, T. & Fukasawa, T. Promoter structure-dependent functioning of the general transcription factor IIE in Saccharomyces cerevisiae. J Biol Chem 272, 15936-42 (1997).
233	Donaldson, A. D. & Kilmartin, J. V. Spc42p: a phosphorylated component of the S. cerevisiae spindle pole body (SPD) with an essential function during SPB duplication. J Cell Biol 132, 887-901 (1996).
234	Francesconi, S. et al. Mutations in conserved yeast DNA primase domains impair DNA replication in vivo. Proc Natl Acad Sci U S A 88, 3877-81 (1991).
235	Stoler, S., Keith, K. C., Curnick, K. E. & Fitzgerald-Hayes, M. A mutation in CSE4, an essential gene encoding a novel chromatin-associated protein in yeast, causes chromosome nondisjunction and cell cycle arrest at mitosis. Genes Dev 9, 573-86 (1995).
236	Li, J. M., Li, Y. & Elledge, S. J. Genetic analysis of the kinetochore DASH complex reveals an antagonistic relationship with the ras/protein kinase A pathway and a novel subunit required for Ask1 association. Mol Cell Biol 25, 767-78 (2005).
237	Brown, M. T. Sequence similarities between the yeast chromosome segregation protein Mif2 and the mammalian centromere protein CENP-C. Gene 160, 111-6 (1995).
238	Brown, M. T., Goetsch, L. & Hartwell, L. H. MIF2 is required for mitotic spindle integrity during anaphase spindle elongation in Saccharomyces cerevisiae. J Cell Biol 123, 387-403 (1993).
239	Zheng, J., Khalil, M. & Cannon, J. F. Glc7p protein phosphatase inhibits expression of glutamine-fructose-6-phosphate transaminase from GFA1. J Biol Chem 275, 18070-8 (2000).
240	Loo, S., Laurenson, P., Foss, M., Dillin, A. & Rine, J. Roles of ABF1, NPL3, and YCL54 in silencing in Saccharomyces cerevisiae. Genetics 141, 889-902 (1995).
241	Claypool, J. A. et al. Tor pathway regulates Rrn3p-dependent recruitment of yeast RNA polymerase I to the promoter but does not participate in alteration of the number of active genes. Mol Biol Cell 15, 946-56 (2004).
242	Gaynor, E. C. et al. MCD4 encodes a conserved endoplasmic reticulum membrane protein essential for glycosylphosphatidylinositol anchor synthesis in yeast. Mol Biol Cell 10, 627-48 (1999).
243	Huber, M. D., Dworet, J. H., Shire, K., Frappier, L. & McAlear, M. A. The budding yeast homolog of the human EBNA1-binding protein 2 (Ebp2p) is an essential nucleolar protein required for pre-rRNA processing. J Biol Chem 275, 28764-73 (2000).
244	Brenner, T. J. & Guthrie, C. Genetic analysis reveals a role for the C terminus of the Saccharomyces cerevisiae GTPase Snu114 during spliceosome activation. Genetics 170, 1063-80 (2005).
245	Peggie, M. W. et al. Essential functions of Sds22p in chromosome stability and nuclear localization of PP1. J Cell Sci 115, 195-206 (2002).
246	Helliwell, S. B., Howald, I., Barbet, N. & Hall, M. N. TOR2 is part of two related signaling pathways coordinating cell growth in Saccharomyces cerevisiae. Genetics 148, 99-112 (1998).
247	Shimada, K., Pasero, P. & Gasser, S. M. ORC and the intra-S-phase checkpoint: a threshold regulates Rad53p activation in S phase. Genes Dev 16, 3236-52 (2002).
248	Patel, D. & Butler, J. S. Conditional defect in mRNA 3' end processing caused by a mutation in the gene for poly(A) polymerase. Mol Cell Biol 12, 3297-304 (1992).
249	Kasten, M. et al. Tandem bromodomains in the chromatin remodeler RSC recognize acetylated histone H3 Lys14. Embo J 23, 1348-59 (2004).
250	Montpetit, B. et al. Genome-wide synthetic lethal screens identify an interaction between the nuclear envelope protein, Apq12p, and the kinetochore in Saccharomyces cerevisiae. Genetics 171, 489-501 (2005).
251	Sakurai, H. & Fukasawa, T. Artificial recruitment of certain Mediator components affects requirement of basal transcription factor IIE. Genes Cells 8, 41-50 (2003).
252	Janke, C., Ortiz, J., Tanaka, T. U., Lechner, J. & Schiebel, E. Four new subunits of the Dam1-Duo1 complex reveal novel functions in sister kinetochore biorientation. Embo J 21, 181-93 (2002).
253	Burgess, S. M. & Guthrie, C. A mechanism to enhance mRNA splicing fidelity: the RNA-dependent ATPase Prp16 governs usage of a discard pathway for aberrant lariat intermediates. Cell 73, 1377-91 (1993).
254	Kilmartin, J. V. Sfi1p has conserved centrin-binding sites and an essential function in budding yeast spindle pole body duplication. J Cell Biol 162, 1211-21 (2003).
255	Huang, D. & Koshland, D. Chromosome integrity in Saccharomyces cerevisiae: the interplay of DNA replication initiation factors, elongation factors, and origins. Genes Dev 17, 1741-54 (2003).
256	Toh-e, A. & Oguchi, T. Defects in glycosylphosphatidylinositol (GPI) anchor synthesis activate Hog1 kinase and confer copper-resistance in Saccharomyces cerevisisae. Genes Genet Syst 76, 393-410 (2001).
257	Lappalainen, P., Fedorov, E. V., Fedorov, A. A., Almo, S. C. & Drubin, D. G. Essential functions and actin-binding surfaces of yeast cofilin revealed by systematic mutagenesis. Embo J 16, 5520-30 (1997).
258	Maines, S., Negritto, M. C., Wu, X., Manthey, G. M. & Bailis, A. M. Novel mutations in the RAD3 and SSL1 genes perturb genome stability by stimulating recombination between short repeats in Saccharomyces cerevisiae. Genetics 150, 963-76 (1998).
259	Fujioka, Y., Kimata, Y., Nomaguchi, K., Watanabe, K. & Kohno, K. Identification of a novel non-structural maintenance of chromosomes (SMC) component of the SMC5-SMC6 complex involved in DNA repair. J Biol Chem 277, 21585-91 (2002).
260	Truscott, K. N. et al. A J-protein is an essential subunit of the presequence translocase-associated protein import motor of mitochondria. J Cell Biol 163, 707-13 (2003).
261	Spang, A. & Schekman, R. Reconstitution of retrograde transport from the Golgi to the ER in vitro. J Cell Biol 143, 589-99 (1998).
262	Severin, F., Habermann, B., Huffaker, T. & Hyman, T. Stu2 promotes mitotic spindle elongation in anaphase. J Cell Biol 153, 435-42 (2001).
263	Fang, H., Mullins, C. & Green, N. In addition to SEC11, a newly identified gene, SPC3, is essential for signal peptidase activity in the yeast endoplasmic reticulum. J Biol Chem 272, 13152-8 (1997).
264	Covitz, P. A., Song, W. & Mitchell, A. P. Requirement for RGR1 and SIN4 in RME1-dependent repression in Saccharomyces cerevisiae. Genetics 138, 577-86 (1994).
265	Freeman, L., Aragon-Alcaide, L. & Strunnikov, A. The condensin complex governs chromosome condensation and mitotic transmission of rDNA. J Cell Biol 149, 811-24 (2000).
266	Grimme, S. J. et al. Deficiencies in the endoplasmic reticulum (ER)-membrane protein Gab1p perturb transfer of glycosylphosphatidylinositol to proteins and cause perinuclear ER-associated actin bar formation. Mol Biol Cell 15, 2758-70 (2004).
267	Kamimura, Y., Tak, Y. S., Sugino, A. & Araki, H. Sld3, which interacts with Cdc45 (Sld4), functions for chromosomal DNA replication in Saccharomyces cerevisiae. Embo J 20, 2097-107 (2001).
268	Winey, M. & Culbertson, M. R. Mutations affecting the tRNA-splicing endonuclease activity of Saccharomyces cerevisiae. Genetics 118, 609-17 (1988).
269	Rutz, B. & Seraphin, B. A dual role for BBP/ScSF1 in nuclear pre-mRNA retention and splicing. Embo J 19, 1873-86 (2000).
270	Zhu, W. et al. Evidence that the pre-mRNA splicing factor Clf1p plays a role in DNA replication in Saccharomyces cerevisiae. Genetics 160, 1319-33 (2002).
271	Kramer, K. M., Fesquet, D., Johnson, A. L. & Johnston, L. H. Budding yeast RSI1/APC2, a novel gene necessary for initiation of anaphase, encodes an APC subunit. Embo J 17, 498-506 (1998).
272	Yaffe, M. P. & Schatz, G. Two nuclear mutations that block mitochondrial protein import in yeast. Proc Natl Acad Sci U S A 81, 4819-23 (1984).
273	Liu, P. C. & Thiele, D. J. Novel stress-responsive genes EMG1 and NOP14 encode conserved, interacting proteins required for 40S ribosome biogenesis. Mol Biol Cell 12, 3644-57 (2001).
274	Johnson, D. R., Knoll, L. J., Rowley, N. & Gordon, J. I. Genetic analysis of the role of Saccharomyces cerevisiae acyl-CoA synthetase genes in regulating protein N-myristoylation. J Biol Chem 269, 18037-46 (1994).
275	Vogel, J. & Snyder, M. The carboxy terminus of Tub4p is required for gamma-tubulin function in budding yeast. J Cell Sci 113 Pt 21, 3871-82 (2000).
276	Vogel, J. et al. Phosphorylation of gamma-tubulin regulates microtubule organization in budding yeast. Dev Cell 1, 621-31 (2001).
277	Bieganowski, P., Shilinski, K., Tsichlis, P. N. & Brenner, C. Cdc123 and checkpoint forkhead associated with RING proteins control the cell cycle by controlling eIF2gamma abundance. J Biol Chem 279, 44656-66 (2004).
278	Johnson, D. I. et al. Mapping of the Saccharomyces cerevisiae CDC3, CDC25, and CDC42 genes to chromosome XII by chromosome blotting and tetrad analysis. Yeast 3, 243-53 (1987).
279	Anand, M., Chakraburtty, K., Marton, M. J., Hinnebusch, A. G. & Kinzy, T. G. Functional interactions between yeast translation eukaryotic elongation factor (eEF) 1A and eEF3. J Biol Chem 278, 6985-91 (2003).
280	Novick, P., Field, C. & Schekman, R. Identification of 23 complementation groups required for post-translational events in the yeast secretory pathway. Cell 21, 205-15 (1980).
281	Bhalla, N., Biggins, S. & Murray, A. W. Mutation of YCS4, a budding yeast condensin subunit, affects mitotic and nonmitotic chromosome behavior. Mol Biol Cell 13, 632-45 (2002).
282	Dalton, S. & Hopwood, B. Characterization of Cdc47p-minichromosome maintenance complexes in Saccharomyces cerevisiae: identification of Cdc45p as a subunit. Mol Cell Biol 17, 5867-75 (1997).
283	Tang, J., Abovich, N., Fleming, M. L., Seraphin, B. & Rosbash, M. Identification and characterization of a yeast homolog of U1 snRNP-specific protein C. Embo J 16, 4082-91 (1997).
284	Audhya, A., Foti, M. & Emr, S. D. Distinct roles for the yeast phosphatidylinositol 4-kinases, Stt4p and Pik1p, in secretion, cell growth, and organelle membrane dynamics. Mol Biol Cell 11, 2673-89 (2000).
285	Cao, Y., Cairns, B. R., Kornberg, R. D. & Laurent, B. C. Sfh1p, a component of a novel chromatin-remodeling complex, is required for cell cycle progression. Mol Cell Biol 17, 3323-34 (1997).
286	Ryan, K. J., Zhou, Y. & Wente, S. R. The karyopherin Kap95 regulates nuclear pore complex assembly into intact nuclear envelopes in vivo. Mol Biol Cell 18, 886-98 (2007).
287	Iovine, M. K. & Wente, S. R. A nuclear export signal in Kap95p is required for both recycling the import factor and interaction with the nucleoporin GLFG repeat regions of Nup116p and Nup100p. J Cell Biol 137, 797-811 (1997).
288	Deshaies, R. J. & Schekman, R. A yeast mutant defective at an early stage in import of secretory protein precursors into the endoplasmic reticulum. J Cell Biol 105, 633-45 (1987).
289	Torres-Rosell, J. et al. SMC5 and SMC6 genes are required for the segregation of repetitive chromosome regions. Nat Cell Biol 7, 412-9 (2005).
290	Nunnari, J. et al. Mitochondrial transmission during mating in Saccharomyces cerevisiae is determined by mitochondrial fusion and fission and the intramitochondrial segregation of mitochondrial DNA. Mol Biol Cell 8, 1233-42 (1997).
291	Ursic, D., Himmel, K. L., Gurley, K. A., Webb, F. & Culbertson, M. R. The yeast SEN1 gene is required for the processing of diverse RNA classes. Nucleic Acids Res 25, 4778-85 (1997).
292	Kraynack, B. A. et al. Dsl1p, Tip20p, and the novel Dsl3(Sec39) protein are required for the stability of the Q/t-SNARE complex at the endoplasmic reticulum in yeast. Mol Biol Cell 16, 3963-77 (2005).
293	Shimizu, Y., Akashi, T., Okuda, A., Kikuchi, A. & Fukui, K. NBP1 (Nap1 binding protein 1), an essential gene for G2/M transition of Saccharomyces cerevisiae, encodes a protein of distinct sub-nuclear localization. Gene 246, 395-404 (2000).
294	Lindstrom, D. L. et al. Dual roles for Spt5 in pre-mRNA processing and transcription elongation revealed by identification of Spt5-associated proteins. Mol Cell Biol 23, 1368-78 (2003).
295	Winey, M. et al. NDC1: a nuclear periphery component required for yeast spindle pole body duplication. J Cell Biol 122, 743-51 (1993).
296	Lockhart, S. R. & Rymond, B. C. Commitment of yeast pre-mRNA to the splicing pathway requires a novel U1 small nuclear ribonucleoprotein polypeptide, Prp39p. Mol Cell Biol 14, 3623-33 (1994).
297	Chen, E. J., Frand, A. R., Chitouras, E. & Kaiser, C. A. A link between secretion and pre-mRNA processing defects in Saccharomyces cerevisiae and the identification of a novel splicing gene, RSE1. Mol Cell Biol 18, 7139-46 (1998).
298	Shirayama, M., Matsui, Y. & Toh, E. A. The yeast TEM1 gene, which encodes a GTP-binding protein, is involved in termination of M phase. Mol Cell Biol 14, 7476-82 (1994).
299	Schlesinger, M. B. & Formosa, T. POB3 is required for both transcription and replication in the yeast Saccharomyces cerevisiae. Genetics 155, 1593-606 (2000).
300	VanDemark, A. P. et al. The structure of the yFACT Pob3-M domain, its interaction with the DNA replication factor RPA, and a potential role in nucleosome deposition. Mol Cell 22, 363-74 (2006).
301	Lemaire, M. & Collart, M. A. The TATA-binding protein-associated factor yTafII19p functionally interacts with components of the global transcriptional regulator Ccr4-Not complex and physically interacts with the Not5 subunit. J Biol Chem 275, 26925-34 (2000).
302	Stirling, C. J. & Hewitt, E. W. The S. cerevisiae SEC65 gene encodes a component of yeast signal recognition particle with homology to human SRP19. Nature 356, 534-7 (1992).
303	Frand, A. R. & Kaiser, C. A. The ERO1 gene of yeast is required for oxidation of protein dithiols in the endoplasmic reticulum. Mol Cell 1, 161-70 (1998).
304	Beck, T. & Hall, M. N. The TOR signalling pathway controls nuclear localization of nutrient-regulated transcription factors. Nature 402, 689-92 (1999).
305	Szerlong, H., Saha, A. & Cairns, B. R. The nuclear actin-related proteins Arp7 and Arp9: a dimeric module that cooperates with architectural proteins for chromatin remodeling. Embo J 22, 3175-87 (2003).
306	Hartman, T., Stead, K., Koshland, D. & Guacci, V. Pds5p is an essential chromosomal protein required for both sister chromatid cohesion and condensation in Saccharomyces cerevisiae. J Cell Biol 151, 613-26 (2000).
307	Doheny, K. F. et al. Identification of essential components of the S. cerevisiae kinetochore. Cell 73, 761-74 (1993).
308	Han, S. J. et al. Activator-specific requirement of yeast mediator proteins for RNA polymerase II transcriptional activation. Mol Cell Biol 19, 979-88 (1999).
309	Fischer von Mollard, G. & Stevens, T. H. A human homolog can functionally replace the yeast vesicle-associated SNARE Vti1p in two vesicle transport pathways. J Biol Chem 273, 2624-30 (1998).
310	von Mollard, G. F., Nothwehr, S. F. & Stevens, T. H. The yeast v-SNARE Vti1p mediates two vesicle transport pathways through interactions with the t-SNAREs Sed5p and Pep12p. J Cell Biol 137, 1511-24 (1997).
311	Burns, C. G. et al. Removal of a single alpha-tubulin gene intron suppresses cell cycle arrest phenotypes of splicing factor mutations in Saccharomyces cerevisiae. Mol Cell Biol 22, 801-15 (2002).
312	Karst, F. & Lacroute, F. Ertosterol biosynthesis in Saccharomyces cerevisiae: mutants deficient in the early steps of the pathway. Mol. Gen. Genet. 154, 269-277 (1977).
313	Torchet, C., Jacq, C. & Hermann-Le Denmat, S. Two mutant forms of the S1/TPR-containing protein Rrp5p affect the 18S rRNA synthesis in Saccharomyces cerevisiae. Rna 4, 1636-52 (1998).
314	Hutchison, H. T., Hartwell, L. H. & McLaughlin, C. S. Temperature-sensitive yeast mutant defective in ribonucleic acid production. J Bacteriol 99, 807-14 (1969).
315	Apone, L. M. et al. Broad, but not universal, transcriptional requirement for yTAFII17, a histone H3-like TAFII present in TFIID and SAGA. Mol Cell 2, 653-61 (1998).
316	Nagel, R. & Ares, M., Jr. Substrate recognition by a eukaryotic RNase III: the double-stranded RNA-binding domain of Rnt1p selectively binds RNA containing a 5'-AGNN-3' tetraloop. Rna 6, 1142-56 (2000).
317	Pauling, M. H., McPheeters, D. S. & Ares, M., Jr. Functional Cus1p is found with Hsh155p in a multiprotein splicing factor associated with U2 snRNA. Mol Cell Biol 20, 2176-85 (2000).
318	Kobor, M. S. et al. An unusual eukaryotic protein phosphatase required for transcription by RNA polymerase II and CTD dephosphorylation in S. cerevisiae. Mol Cell 4, 55-62 (1999).
319	Leslie, D. M., Grill, B., Rout, M. P., Wozniak, R. W. & Aitchison, J. D. Kap121p-mediated nuclear import is required for mating and cellular differentiation in yeast. Mol Cell Biol 22, 2544-55 (2002).
320	Chen, E. J. & Kaiser, C. A. LST8 negatively regulates amino acid biosynthesis as a component of the TOR pathway. J Cell Biol 161, 333-47 (2003).
321	Hong, B., Wu, K., Brockenbrough, J. S., Wu, P. & Aris, J. P. Temperature sensitive nop2 alleles defective in synthesis of 25S rRNA and large ribosomal subunits in Saccharomyces cerevisiae. Nucleic Acids Res 29, 2927-37 (2001).
322	Gallagher, J. E. & Baserga, S. J. Two-hybrid Mpp10p interaction-defective Imp4 proteins are not interaction defective in vivo but do confer specific pre-rRNA processing defects in Saccharomyces cerevisiae. Nucleic Acids Res 32, 1404-13 (2004).
323	Budd, M. E., Wittrup, K. D., Bailey, J. E. & Campbell, J. L. DNA polymerase I is required for premeiotic DNA replication and sporulation but not for X-ray repair in Saccharomyces cerevisiae. Mol Cell Biol 9, 365-76 (1989).
324	Dunckley, T., Tucker, M. & Parker, R. Two related proteins, Edc1p and Edc2p, stimulate mRNA decapping in Saccharomyces cerevisiae. Genetics 157, 27-37 (2001).
325	Fedor-Chaiken, M., Deschenes, R. J. & Broach, J. R. SRV2, a gene required for RAS activation of adenylate cyclase in yeast. Cell 61, 329-40 (1990).
326	Wesp, A. et al. End4p/Sla2p interacts with actin-associated proteins for endocytosis in Saccharomyces cerevisiae. Mol Biol Cell 8, 2291-306 (1997).
327	Schafer, T., Strauss, D., Petfalski, E., Tollervey, D. & Hurt, E. The path from nucleolar 90S to cytoplasmic 40S pre-ribosomes. Embo J 22, 1370-80 (2003).
328	Kurtz, S. & Shore, D. RAP1 protein activates and silences transcription of mating-type genes in yeast. Genes Dev 5, 616-28 (1991).
329	Pappas, D. L., Jr. & Hampsey, M. Functional interaction between Ssu72 and the Rpb2 subunit of RNA polymerase II in Saccharomyces cerevisiae. Mol Cell Biol 20, 8343-51 (2000).
330	Navas, T. A., Zhou, Z. & Elledge, S. J. DNA polymerase epsilon links the DNA replication machinery to the S phase checkpoint. Cell 80, 29-39 (1995).
331	Kaiser, C. A. & Schekman, R. Distinct sets of SEC genes govern transport vesicle formation and fusion early in the secretory pathway. Cell 61, 723-33 (1990).
332	Rodal, A. A. et al. Conformational changes in the Arp2/3 complex leading to actin nucleation. Nat Struct Mol Biol 12, 26-31 (2005).
333	Suzuki, N. et al. The Saccharomyces cerevisiae small GTPase, Gsp1p/Ran, is involved in 3' processing of 7S-to-5.8S rRNA and in degradation of the excised 5'-A0 fragment of 35S pre-rRNA, both of which are carried out by the exosome. Genetics 158, 613-25 (2001).
334	Osborne, M. A., Schlenstedt, G., Jinks, T. & Silver, P. A. Nuf2, a spindle pole body-associated protein required for nuclear division in yeast. J Cell Biol 125, 853-66 (1994).
335	Minvielle-Sebastia, L. et al. Control of cleavage site selection during mRNA 3' end formation by a yeast hnRNP. Embo J 17, 7454-68 (1998).
336	Brown, J. T., Yang, X. & Johnson, A. W. Inhibition of mRNA turnover in yeast by an xrn1 mutation enhances the requirement for eIF4E binding to eIF4G and for proper capping of transcripts by Ceg1p. Genetics 155, 31-42 (2000).
337	de la Cruz, J., Lacombe, T., Deloche, O., Linder, P. & Kressler, D. The putative RNA helicase Dbp6p functionally interacts with Rpl3p, Nop8p and the novel trans-acting Factor Rsa3p during biogenesis of 60S ribosomal subunits in Saccharomyces cerevisiae. Genetics 166, 1687-99 (2004).
338	Dubaquie, Y., Looser, R. & Rospert, S. Significance of chaperonin 10-mediated inhibition of ATP hydrolysis by chaperonin 60. Proc Natl Acad Sci U S A 94, 9011-6 (1997).
339	Tseng, S. S. et al. Dbp5p, a cytosolic RNA helicase, is required for poly(A)+ RNA export. Embo J 17, 2651-62 (1998).
340	Amberg, D. C., Goldstein, A. L. & Cole, C. N. Isolation and characterization of RAT1: an essential gene of Saccharomyces cerevisiae required for the efficient nucleocytoplasmic trafficking of mRNA. Genes Dev 6, 1173-89 (1992).
341	Kitagawa, K., Skowyra, D., Elledge, S. J., Harper, J. W. & Hieter, P. SGT1 encodes an essential component of the yeast kinetochore assembly pathway and a novel subunit of the SCF ubiquitin ligase complex. Mol Cell 4, 21-33 (1999).
342	Lewis, M. J. & Pelham, H. R. SNARE-mediated retrograde traffic from the Golgi complex to the endoplasmic reticulum. Cell 85, 205-15 (1996).
343	Wolven, A. K., Belmont, L. D., Mahoney, N. M., Almo, S. C. & Drubin, D. G. In vivo importance of actin nucleotide exchange catalyzed by profilin. J Cell Biol 150, 895-904 (2000).
344	Grimme, S. J., Westfall, B. A., Wiedman, J. M., Taron, C. H. & Orlean, P. The essential Smp3 protein is required for addition of the side-branching fourth mannose during assembly of yeast glycosylphosphatidylinositols. J Biol Chem 276, 27731-9 (2001).
345	Scafe, C., Nonet, M. & Young, R. A. RNA polymerase II mutants defective in transcription of a subset of genes. Mol Cell Biol 10, 1010-6 (1990).
346	Asleson, E. N. & Livingston, D. M. Investigation of the stability of yeast rad52 mutant proteins uncovers post-translational and transcriptional regulation of Rad52p. Genetics 163, 91-101 (2003).
347	Chuang, R. Y., Weaver, P. L., Liu, Z. & Chang, T. H. Requirement of the DEAD-Box protein ded1p for messenger RNA translation. Science 275, 1468-71 (1997).
348	Burckin, T. et al. Exploring functional relationships between components of the gene expression machinery. Nat Struct Mol Biol 12, 175-82 (2005).
349	Laloraya, S., Dekker, P. J., Voos, W., Craig, E. A. & Pfanner, N. Mitochondrial GrpE modulates the function of matrix Hsp70 in translocation and maturation of preproteins. Mol Cell Biol 15, 7098-105 (1995).
350	Bird, A. W. et al. Acetylation of histone H4 by Esa1 is required for DNA double-strand break repair. Nature 419, 411-5 (2002).
351	Clarke, A. S., Lowell, J. E., Jacobson, S. J. & Pillus, L. Esa1p is an essential histone acetyltransferase required for cell cycle progression. Mol Cell Biol 19, 2515-26 (1999).
352	Harkness, T. A., Davies, G. F., Ramaswamy, V. & Arnason, T. G. The ubiquitin-dependent targeting pathway in Saccharomyces cerevisiae plays a critical role in multiple chromatin assembly regulatory steps. Genetics 162, 615-32 (2002).
353	Rothblatt, J. A., Deshaies, R. J., Sanders, S. L., Daum, G. & Schekman, R. Multiple genes are required for proper insertion of secretory proteins into the endoplasmic reticulum in yeast. J Cell Biol 109, 2641-52 (1989).
354	Schild, D., Ananthaswamy, H. N. & Mortimer, R. K. An endomitotic effect of a cell cycle mutation of Saccharomyces cerevisiae. Genetics 97, 551-62 (1981).
355	Vallen, E. A., Ho, W., Winey, M. & Rose, M. D. Genetic interactions between CDC31 and KAR1, two genes required for duplication of the microtubule organizing center in Saccharomyces cerevisiae. Genetics 137, 407-22 (1994).
356	McDonald, H. B., Helfant, A. H., Mahony, E. M., Khosla, S. K. & Goetsch, L. Mutational analysis reveals a role for the C terminus of the proteasome subunit Rpt4p in spindle pole body duplication in Saccharomyces cerevisiae. Genetics 162, 705-20 (2002).
357	Harashima, S. & Hinnebusch, A. G. Multiple GCD genes required for repression of GCN4, a transcriptional activator of amino acid biosynthetic genes in Saccharomyces cerevisiae. Mol Cell Biol 6, 3990-8 (1986).
358	Miles, T. D. et al. Ytm1, Nop7, and Erb1 form a complex necessary for maturation of yeast 66S preribosomes. Mol Cell Biol 25, 10419-32 (2005).
359	Miyoshi, K. et al. Rrs1p, a ribosomal protein L11-binding protein, is required for nuclear export of the 60S pre-ribosomal subunit in Saccharomyces cerevisiae. FEBS Lett 565, 106-10 (2004).
360	Schott, D., Ho, J., Pruyne, D. & Bretscher, A. The COOH-terminal domain of Myo2p, a yeast myosin V, has a direct role in secretory vesicle targeting. J Cell Biol 147, 791-808 (1999).
361	Henry, K. R. et al. Scd5p and clathrin function are important for cortical actin organization, endocytosis, and localization of sla2p in yeast. Mol Biol Cell 13, 2607-25 (2002).
362	Chang, J. S., Henry, K., Wolf, B. L., Geli, M. & Lemmon, S. K. Protein phosphatase-1 binding to scd5p is important for regulation of actin organization and endocytosis in yeast. J Biol Chem 277, 48002-8 (2002).
363	Bedard, D. P., Johnston, G. C. & Singer, R. A. New mutations in the yeast Saccharomyces cerevisiae affecting completion of “start”. Curr Genet 4, 205-214 (1981).
364	Levinson, J. N., Shahinian, S., Sdicu, A. M., Tessier, D. C. & Bussey, H. Functional, comparative and cell biological analysis of Saccharomyces cerevisiae Kre5p. Yeast 19, 1243-59 (2002).
365	Wittekind, M. et al. Isolation and characterization of temperature-sensitive mutations in RPA190, the gene encoding the largest subunit of RNA polymerase I from Saccharomyces cerevisiae. Mol Cell Biol 8, 3997-4008 (1988).
366	McCusker, J. H., Yamagishi, M., Kolb, J. M. & Nomura, M. Suppressor analysis of temperature-sensitive RNA polymerase I mutations in Saccharomyces cerevisiae: suppression of mutations in a zinc-binding motif by transposed mutant genes. Mol Cell Biol 11, 746-53 (1991).
367	Hanic-Joyce, P. J., Singer, R. A. & Johnston, G. C. Molecular characterization of the yeast PRT1 gene in which mutations affect translation initiation and regulation of cell proliferation. J Biol Chem 262, 2845-51 (1987).
368	Bialek-Wyrzykowska, U. et al. Low levels of Ypt protein prenylation cause vesicle polarization defects and thermosensitive growth that can be suppressed by genes involved in cell wall maintenance. Mol Microbiol 35, 1295-311 (2000).
369	Li, S. J. & Hochstrasser, M. A new protease required for cell-cycle progression in yeast. Nature 398, 246-51 (1999).
370	Sun, C. & Woolford, J. L., Jr. The yeast nucleolar protein Nop4p contains four RNA recognition motifs necessary for ribosome biogenesis. J Biol Chem 272, 25345-52 (1997).
371	Piatti, S., Tazzi, R., Pizzagalli, A., Plevani, P. & Lucchini, G. Control of DNA synthesis genes in budding yeast: involvement of the transcriptional modulator MOT1 in the expression of the DNA polymerase alpha gene. Chromosoma 102, S107-13 (1992).
372	Kallstrom, G., Hedges, J. & Johnson, A. The putative GTPases Nog1p and Lsg1p are required for 60S ribosomal subunit biogenesis and are localized to the nucleus and cytoplasm, respectively. Mol Cell Biol 23, 4344-55 (2003).
373	Deshaies, R. J. & Schekman, R. Structural and functional dissection of Sec62p, a membrane-bound component of the yeast endoplasmic reticulum protein import machinery. Mol Cell Biol 10, 6024-35 (1990).
374	Adams, I. R. & Kilmartin, J. V. Localization of core spindle pole body (SPB) components during SPB duplication in Saccharomyces cerevisiae. J Cell Biol 145, 809-23 (1999).
375	Elliott, S., Knop, M., Schlenstedt, G. & Schiebel, E. Spc29p is a component of the Spc110p subcomplex and is essential for spindle pole body duplication. Proc Natl Acad Sci U S A 96, 6205-10 (1999).
376	Segref, A. et al. Mex67p, a novel factor for nuclear mRNA export, binds to both poly(A)+ RNA and nuclear pores. Embo J 16, 3256-71 (1997).
377	Leidich, S. D. et al. Temperature-sensitive yeast GPI anchoring mutants gpi2 and gpi3 are defective in the synthesis of N-acetylglucosaminyl phosphatidylinositol. Cloning of the GPI2 gene. J Biol Chem 270, 13029-35 (1995).
378	Conrad, N. K. et al. A yeast heterogeneous nuclear ribonucleoprotein complex associated with RNA polymerase II. Genetics 154, 557-71 (2000).
379	Chan, C. S. & Botstein, D. Isolation and characterization of chromosome-gain and increase-in-ploidy mutants in yeast. Genetics 135, 677-91 (1993).
380	Zanchin, N. I., Roberts, P., DeSilva, A., Sherman, F. & Goldfarb, D. S. Saccharomyces cerevisiae Nip7p is required for efficient 60S ribosome subunit biogenesis. Mol Cell Biol 17, 5001-15 (1997).
381	Gelperin, D., Horton, L., Beckman, J., Hensold, J. & Lemmon, S. K. Bms1p, a novel GTP-binding protein, and the related Tsr1p are required for distinct steps of 40S ribosome biogenesis in yeast. Rna 7, 1268-83 (2001).
382	Lehman, K., Schwer, B., Ho, C. K., Rouzankina, I. & Shuman, S. A conserved domain of yeast RNA triphosphatase flanking the catalytic core regulates self-association and interaction with the guanylyltransferase component of the mRNA capping apparatus. J Biol Chem 274, 22668-78 (1999).
383	Barros, M. H., Nobrega, F. G. & Tzagoloff, A. Mitochondrial ferredoxin is required for heme A synthesis in Saccharomyces cerevisiae. J Biol Chem 277, 9997-10002 (2002).
384	Lafontaine, D. L., Preiss, T. & Tollervey, D. Yeast 18S rRNA dimethylase Dim1p: a quality control mechanism in ribosome synthesis? Mol Cell Biol 18, 2360-70 (1998).
385	Senger, B. et al. The nucle(ol)ar Tif6p and Efl1p are required for a late cytoplasmic step of ribosome synthesis. Mol Cell 8, 1363-73 (2001).
386	Cairns, B. R., Erdjument-Bromage, H., Tempst, P., Winston, F. & Kornberg, R. D. Two actin-related proteins are shared functional components of the chromatin-remodeling complexes RSC and SWI/SNF. Mol Cell 2, 639-51 (1998).
387	Grote, E., Carr, C. M. & Novick, P. J. Ordering the final events in yeast exocytosis. J Cell Biol 151, 439-52 (2000).
388	Ranish, J. A., Yudkovsky, N. & Hahn, S. Intermediates in formation and activity of the RNA polymerase II preinitiation complex: holoenzyme recruitment and a postrecruitment role for the TATA box and TFIIB. Genes Dev 13, 49-63 (1999).
389	Chen, P. & Hochstrasser, M. Autocatalytic subunit processing couples active site formation in the 20S proteasome to completion of assembly. Cell 86, 961-72 (1996).
390	Isono, E., Saeki, Y., Yokosawa, H. & Toh-e, A. Rpn7 Is required for the structural integrity of the 26 S proteasome of Saccharomyces cerevisiae. J Biol Chem 279, 27168-76 (2004).
391	Lalo, D., Carles, C., Sentenac, A. & Thuriaux, P. Interactions between three common subunits of yeast RNA polymerases I and III. Proc Natl Acad Sci U S A 90, 5524-8 (1993).
392	Fischbeck, J. A., Kraemer, S. M. & Stargell, L. A. SPN1, a conserved gene identified by suppression of a postrecruitment-defective yeast TATA-binding protein mutant. Genetics 162, 1605-16 (2002).
393	Keogh, M. C., Podolny, V. & Buratowski, S. Bur1 kinase is required for efficient transcription elongation by RNA polymerase II. Mol Cell Biol 23, 7005-18 (2003).
394	Araki, H., Hamatake, R. K., Johnston, L. H. & Sugino, A. DPB2, the gene encoding DNA polymerase II subunit B, is required for chromosome replication in Saccharomyces cerevisiae. Proc Natl Acad Sci U S A 88, 4601-5 (1991).
395	Beggs, J. D. Yeast protein splicing factors involved in nuclear pre-mRNA splicing. Mol Biol Rep 18, 99-103 (1993).
396	Orlean, P., Albright, C. & Robbins, P. W. Cloning and sequencing of the yeast gene for dolichol phosphate mannose synthase, an essential protein. J Biol Chem 263, 17499-507 (1988).
397	Li, Z. et al. Systematic exploration of essential yeast gene function with temperature-sensitive mutants. Nature Biotechnology 29, 361-7 (2011).
398	Miyamoto, S. et al. A DBL-homologous region of the yeast CLS4/CDC24 gene product is important for Ca(2+)-modulated bud assembly. Biochem Biophys Res Commun 181, 604-10 (1991)
399	Ehrenhofer-Murray, A. E., Gossen, M., Pak, D. T., Botchan, M. R., Rine, J. Separation of origin recognition complex functions by cross-species complementation. Science 270, 1671-4 (1995)
400	Schott, E. J., Hoyt, M. A. Dominant alleles of Saccharomyces cerevisiae CDC20 reveal its role in promoting anaphase. Genetics 148, 599-610 (1998)
401	Sikorski, R. S., Michaud, W. A., Hieter, P. p62cdc23 of Saccharomyces cerevisiae: a nuclear tetratricopeptide repeat protein with two mutable domains. Mol Cell Biol 13, 1212-21 (1993)
402	Tye, B. K. The MCM2-3-5 proteins: are they replication licensing factors? Trends Cell Biol 4, 160-6 (1994)
403	Higashio, H., Sato, K., Nakano, A. Smy2p Participates in COPII Vesicle Formation Through the Interaction with Sec23p/Sec24p Subcomplex. Traffic 9, 79-93 (2008).
404	Sundberg, H. A., Davis, T. N. A Mutational Analysis Identifies Three Functional Regions of the Spindle Pole Component Spc110p in Saccharomyces cerevisiae. Mol Biol Cell 8, 2575-90 (1997)
405	Reijo, R. A., Cooper, E. M., Beagle, G. J., Huffaker, T.C. Systematic Mutational Analysis of the Yeast B-Tubulin Gene. Mol Biol Cell 5, 29-43 (1994)
